# Supplementary material for: Mechanisms and energetics of benzophenone photosensitized thymine damage and repair from Paternò–Büchi cycloaddition
Source: Royal Society of Chemistry journal article supplement (doi:10.1039/d3cp00482a), 2023-01-01
Supplement: d3cp00482a1.pdf [file d3cp00482a1.pdf]

## Supporting Information

# Mechanisms and Energetics for Benzophenone Photosensitized Thymine Damage and Repair from Paternò-Büchi Cycloaddition

Yingli Su, Yan Shen, Xiangyuan Li and Haisheng Ren\*

School of Chemical Engineering, Sichuan University, Chengdu 610065, China. E-mail: renhs@scu.edu.cn

## Table of Contents

|                                    |                |
|------------------------------------|----------------|
| <b>Supplementary Figures S1-S7</b> | <b>S2-S7</b>   |
| <b>Supplementary Tables S1-S8</b>  | <b>S8-S13</b>  |
| <b>Cartesian Coordinates</b>       | <b>S14-S29</b> |

## Supplementary Figures

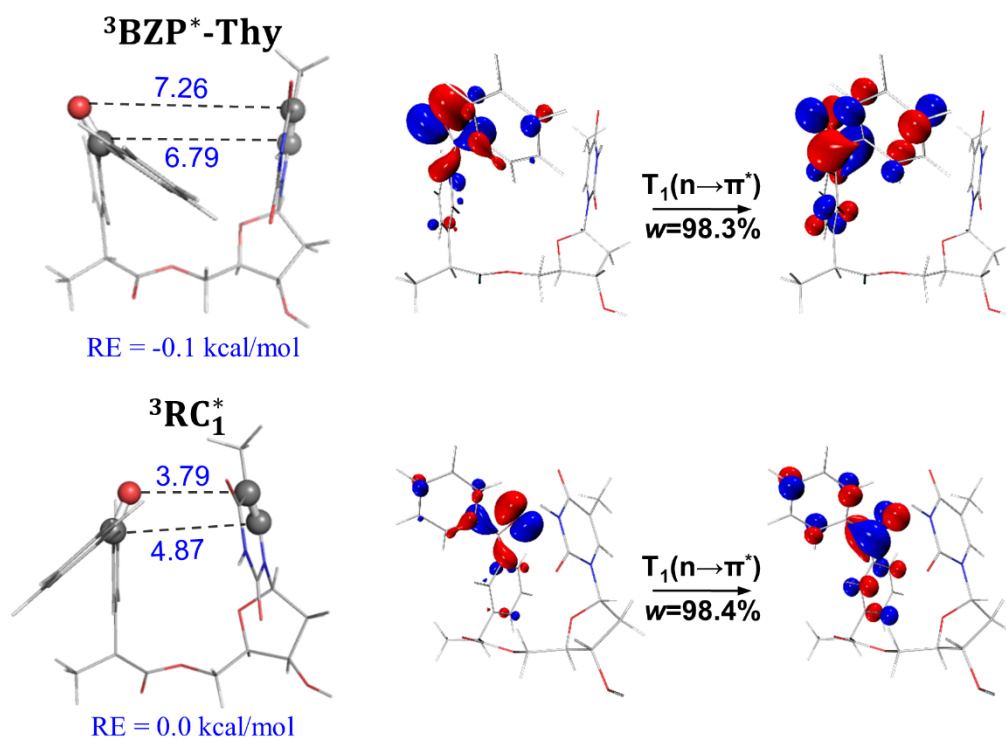

**Figure S1.** The optimized geometries of  ${}^3\text{BZP}^*\text{-Thy}$  and  ${}^3\text{RC}_1^*$  and their main hole and electron natural transition orbitals (NTO, isovalue =  $0.05 \text{ e} \cdot \text{\AA}^{-3}$ ) for  $T_1$  excited states. RE stand for the  $T_1$  energies relative to  ${}^3\text{RC}_1^*$ . The bond lengths of C1-C4 and O2-C3 are marked (Units in  $\text{\AA}$ ). The color of the atoms in white, grey, blue and red stand for hydrogen, carbon, nitrogen and oxygen, respectively.

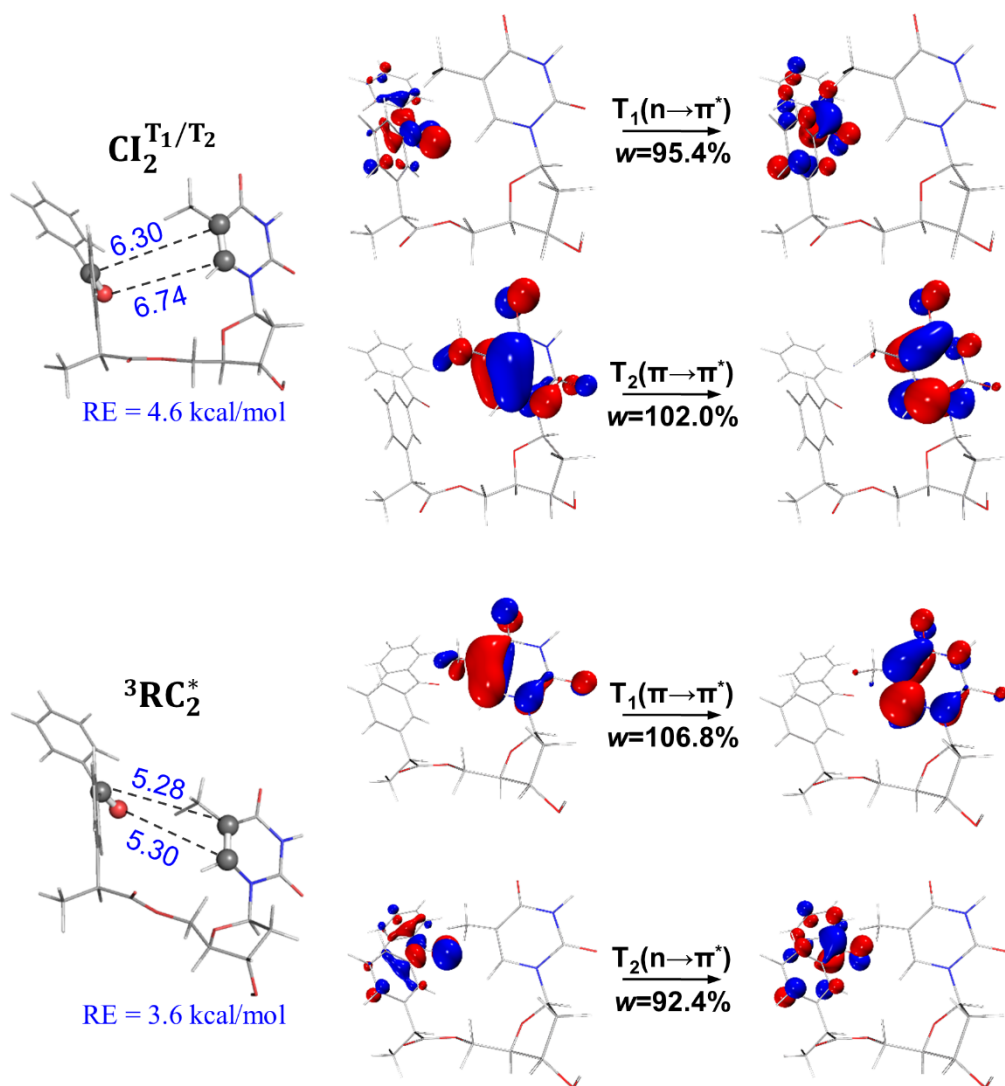

**Figure S2.** The optimized geometries of  $CI_2^{T_1/T_2}$  and  ${}^3RC_2^*$  and their main hole and electron NTO (Isovalue =  $0.05 e \cdot \text{\AA}^{-3}$ ) for  $T_1$  and  $T_2$  excited states. RE stand for the  $T_1$  energies relative to  ${}^3RC_1^*$ . The bond lengths of C1-C3 and O2-C4 are marked (Units in Å). The color of the atoms in white, grey, blue and red stand for hydrogen, carbon, nitrogen and oxygen, respectively.

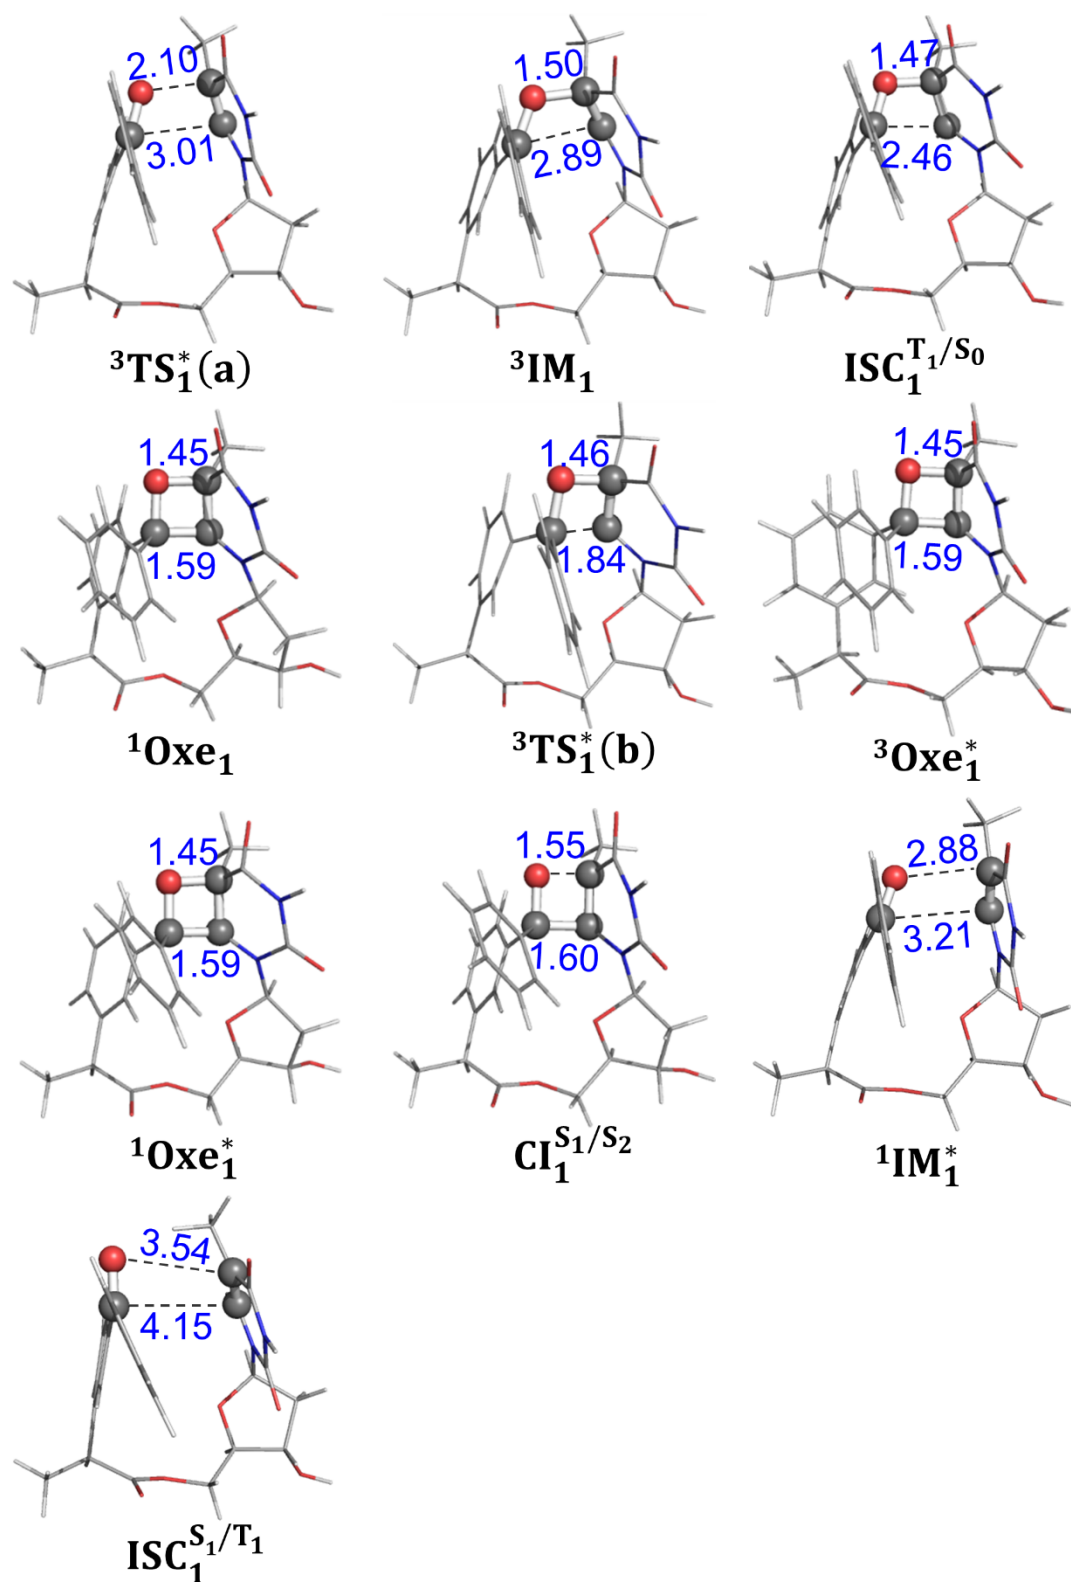

**Figure S3.** The optimized geometries of the head-to-head Paternò-Büchi cycloaddition and corresponding photoinduced cycloreversion with the bond lengths of C1-C4 and O2-C3 (Units in Å).

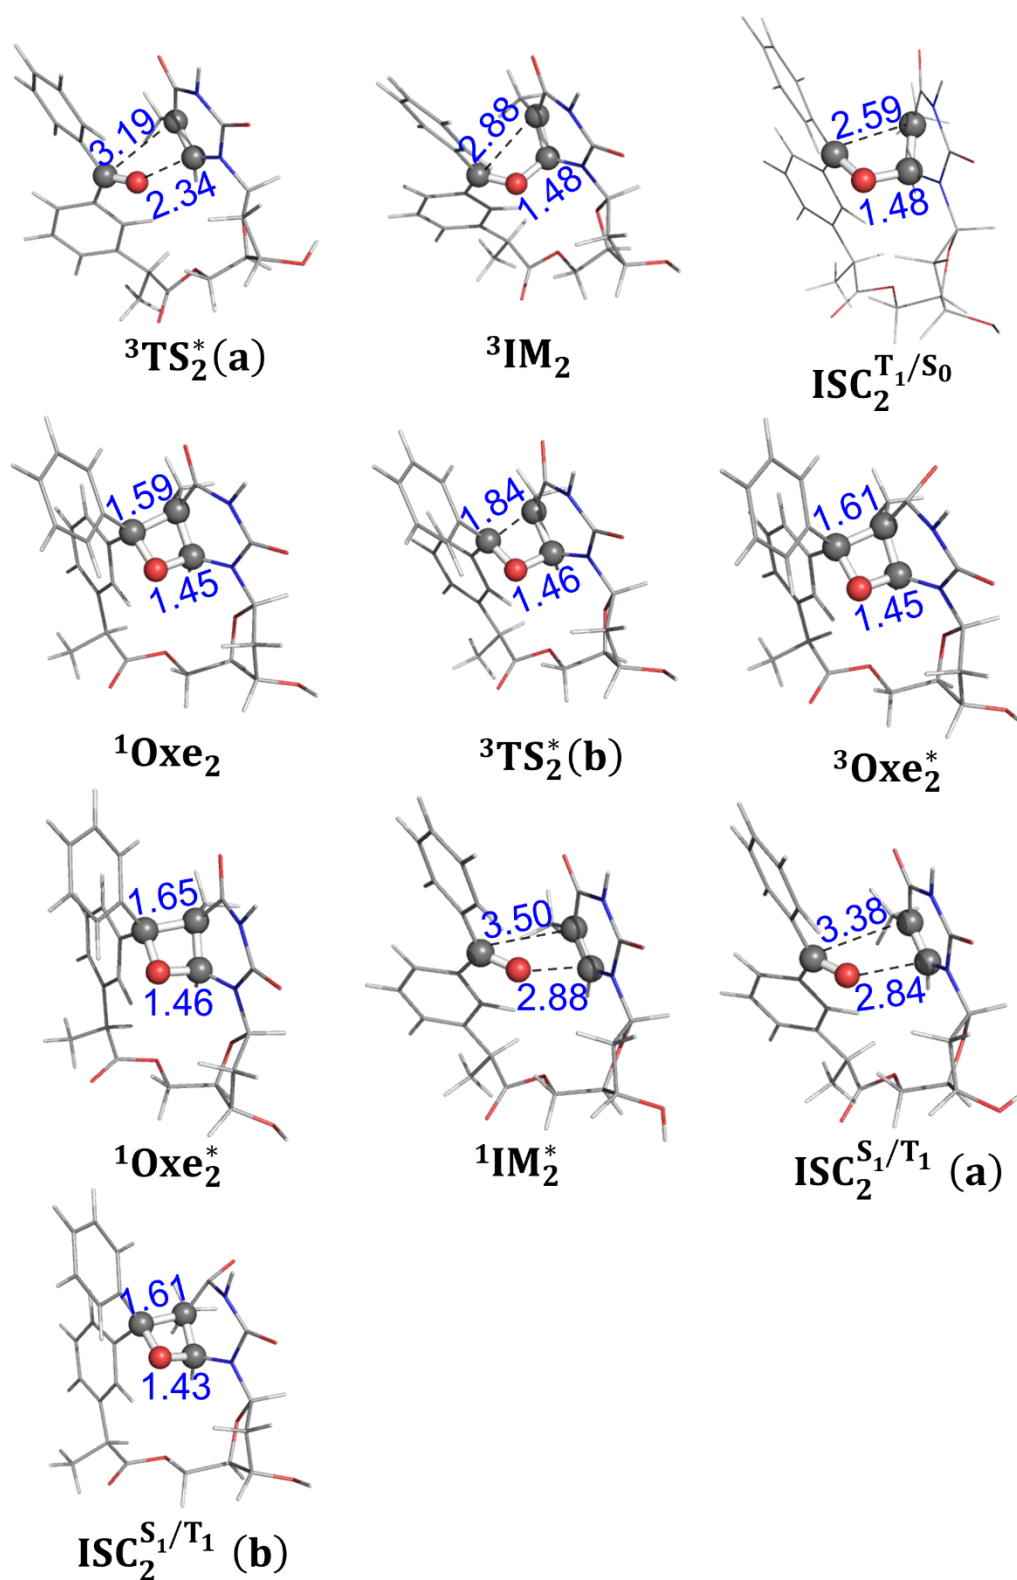

**Figure S4.** The optimized geometries of the head-to-tail Paternò-Büchi cycloaddition and corresponding photoinduced cycloreversion with the bond lengths of C1-C3 and O2-C4 (Units in Å).

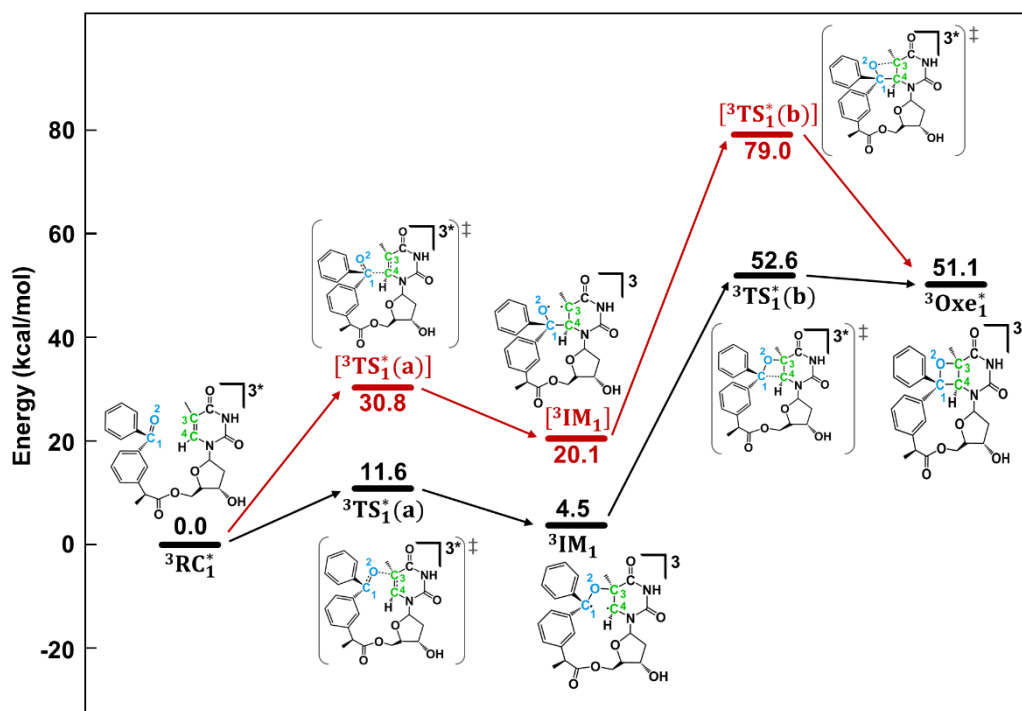

**Figure S5.** Reaction pathways and potential energy profiles of PB cycloaddition for BZP-Thy in acetonitrile in the head-to-head form. The red and black lines represent the paths for the first formation of C1-C4 bond and O2-C3 bond, respectively. The energy is relative to the  $T_1$  state energy of  ${}^3RC_1^*$ .

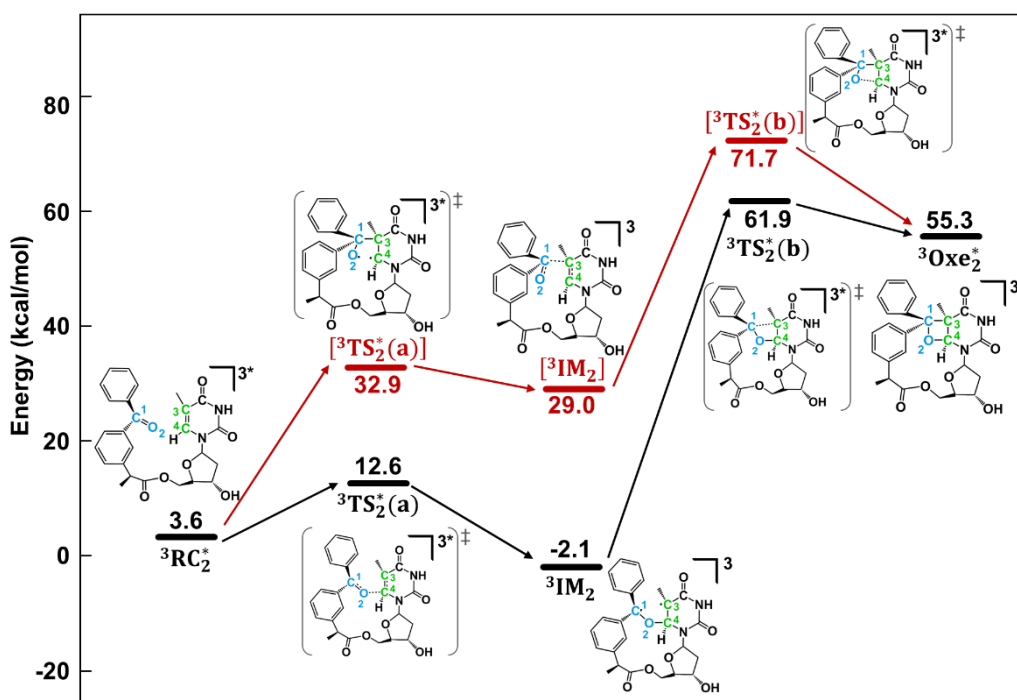

**Figure S6.** Reaction pathways and potential energy profiles of PB cycloaddition for BZP-Thy in acetonitrile in the head-to-tail form. The red and black lines represent the paths for the first formation of C1-C3 bond and O2-C4 bond, respectively. The energy is relative to the  $T_1$  state energy of  ${}^3RC_1^*$ .

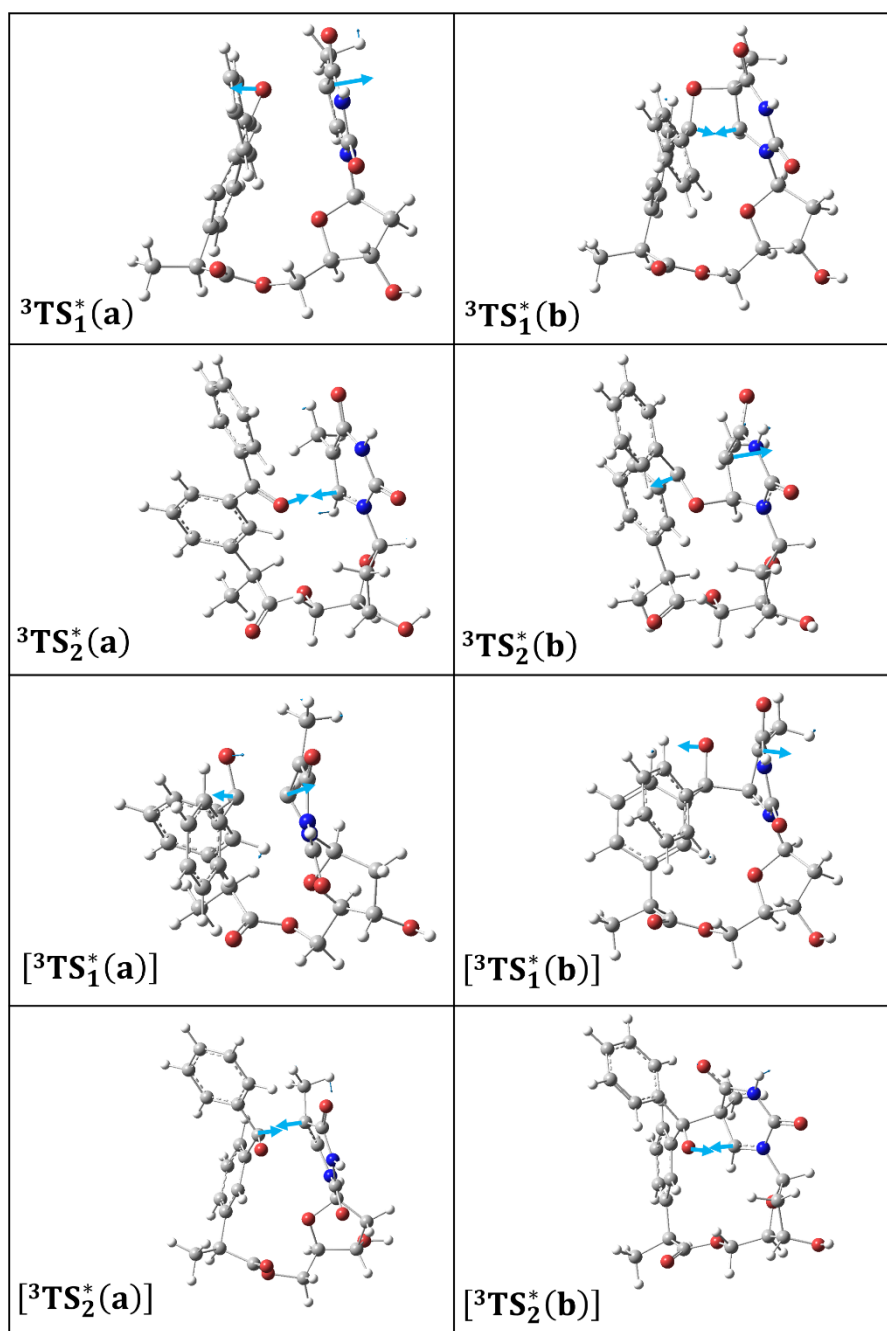

**Figure S7.** Schematic diagram of the vibrational motion along the unique imaginary frequency ( $\nu$ ) for each transition state.

## Supplementary Tables

**Table S1.** The unique imaginary frequency ( $\text{cm}^{-1}$ ) for each transition state.

| Transition state                         | Imaginary frequency |
|------------------------------------------|---------------------|
| ${}^3\text{TS}_1^*(\text{a})$            | -213.42             |
| ${}^3\text{TS}_1^*(\text{b})$            | -778.80             |
| ${}^3\text{TS}_2^*(\text{a})$            | -162.35             |
| ${}^3\text{TS}_2^*(\text{b})$            | -1269.33            |
| $\overline{{}^3\text{TS}_1^*(\text{a})}$ | -304.72             |
| $\overline{{}^3\text{TS}_1^*(\text{b})}$ | -425.82             |
| $\overline{{}^3\text{TS}_2^*(\text{a})}$ | -420.15             |
| $\overline{{}^3\text{TS}_2^*(\text{b})}$ | -643.33             |

**Table S2.** The spin orbit coupling (SOC in  $\text{cm}^{-1}$ ) in the optimized ISC regions.

| ISC process                                         | SOC               |
|-----------------------------------------------------|-------------------|
| ${}^3\text{IM}_1 \rightarrow {}^1\text{Oxe}_1$      | 3.14              |
| ${}^1\text{Oxe}_1^* \rightarrow {}^3\text{Oxe}_1^*$ | 0.81 <sup>a</sup> |
| ${}^1\text{IM}_1^* \rightarrow {}^3\text{RC}^*$     | 0.84              |
| ${}^3\text{IM}_2 \rightarrow {}^1\text{Oxe}_2$      | 4.65              |
| ${}^1\text{Oxe}_2^* \rightarrow {}^3\text{Oxe}_2^*$ | 0.70              |
| ${}^1\text{IM}_2^* \rightarrow {}^3\text{RC}^*$     | 2.40              |

<sup>a</sup> From the ISC starting reactant  ${}^1\text{Oxe}_1^*$ .



**Table S3** The main hole and electron NTO (Isovalue =  $0.05 \text{ e} \cdot \text{\AA}^{-3}$ ) of  $T_1$  excited states along with the IRC ( $\text{amu}^{1/2}\text{bohr}$ ) on the reactant side of  ${}^3\text{TS}_1^*(a)$ . The IRC of  ${}^3\text{TS}_1^*(a)$  is  $0.00 \text{ amu}^{1/2}\text{bohr}$ .

| IRC                                | Hole-NTO                                                                            | Electron-NTO                                                                         |
|------------------------------------|-------------------------------------------------------------------------------------|--------------------------------------------------------------------------------------|
| -6.24                              | 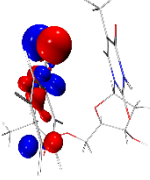   |    |
| -5.03                              |    |    |
| -3.78                              |   |   |
| -2.52                              |  |  |
| -1.26                              |  |  |
| 0.00<br>( ${}^3\text{TS}_1^*(a)$ ) |  |  |

**Table S4.** The main hole and electron NTO (Isovalue =  $0.05 \text{ e} \cdot \text{\AA}^{-3}$ ) of  $T_1$  and  $T_2$  excited states along with the IRC ( $\text{amu}^{1/2}\text{bohr}$ ) on the reactant side  ${}^3\text{TS}_2^*(a)$ . The IRC of  ${}^3\text{TS}_2^*(a)$  is  $0.00 \text{ amu}^{1/2}\text{bohr}$ .

| IRC                                | $T_1$                                                                               |                                                                                     | $T_2$                                                                                |                                                                                       |
|------------------------------------|-------------------------------------------------------------------------------------|-------------------------------------------------------------------------------------|--------------------------------------------------------------------------------------|---------------------------------------------------------------------------------------|
|                                    | Hole-NTO                                                                            | Electron-NTO                                                                        | Hole-NTO                                                                             | Electron-NTO                                                                          |
| -5.43                              | 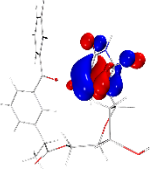   |    |    |    |
| -4.37                              |    |    |    |    |
| -3.36                              |   |   |   |   |
| -2.25                              |  |  |  |  |
| -1.12                              |  |  |  |  |
| 0.00<br>( ${}^3\text{TS}_2^*(a)$ ) |  |  |  |  |

**Table S5.** Relative energy (RE in kcal/mol), vertical excitation energy ( $\Delta E$  in eV), absorption wavelength ( $\lambda$  in nm), oscillator strength  $f$ , solvent reorganization energy (SRE in eV) and dipole moment ( $\mu$  in Debye) of main excited states for the  ${}^1\text{Oxe}_1$  and  ${}^1\text{Oxe}_2$  geometries. The reference energy is the  $T_1$  state energy of  ${}^3\text{RC}_1^*$ .

| Geometry           | State          | RE    | $\Delta E$ | $\lambda$ | $f$    | SRE  | $\mu$ |
|--------------------|----------------|-------|------------|-----------|--------|------|-------|
| ${}^1\text{Oxe}_1$ | S <sub>0</sub> | -34.3 |            |           |        |      | 6.64  |
|                    | S <sub>1</sub> | 77.3  | 4.8444     | 256       | 0.0014 | 0.02 | 5.52  |
|                    | S <sub>2</sub> | 84.0  | 5.1365     | 241       | 0.0375 | 0.08 | 10.36 |
|                    | S <sub>3</sub> | 86.0  | 5.2232     | 237       | 0.0045 | 0.17 | 12.38 |
|                    | S <sub>4</sub> | 87.2  | 5.2743     | 235       | 0.0167 | 0.01 | 7.39  |
|                    | S <sub>5</sub> | 91.0  | 5.4384     | 228       | 0.0051 | 0.12 | 8.19  |
| ${}^1\text{Oxe}_2$ | S <sub>0</sub> | -34.4 |            |           |        |      | 2.77  |
|                    | S <sub>1</sub> | 73.7  | 4.6913     | 264       | 0.0044 | 0.22 | 12.64 |
|                    | S <sub>2</sub> | 77.9  | 4.8716     | 255       | 0.0016 | 0.24 | 12.47 |
|                    | S <sub>3</sub> | 88.4  | 5.3284     | 233       | 0.0038 | 0.03 | 5.05  |
|                    | S <sub>4</sub> | 89.8  | 5.3866     | 230       | 0.0113 | 0.07 | 9.65  |
|                    | S <sub>5</sub> | 90.8  | 5.4315     | 228       | 0.0315 | 0.16 | 13.57 |

The excited-state properties in Table S5 were obtained through the self-consistent state-specific TD-B3LYP/IEFPCM method using Q-Chem 5.4 package. The lowest excited states (S<sub>1</sub>) with small oscillator strengths are located at 256 nm and 264 nm for  ${}^1\text{Oxe}_1$  and  ${}^1\text{Oxe}_2$ , respectively. Combined with the NTO distributions in Table S6, the S<sub>1</sub> states of  ${}^1\text{Oxe}_1$  and  ${}^1\text{Oxe}_2$  were naturally attributed to the  $n \rightarrow \pi^*$  local transition and the  $\pi \rightarrow \pi^*$  charge-transfer transition, respectively. The photoexcited bright states with largest oscillator strengths for  ${}^1\text{Oxe}_1$  and  ${}^1\text{Oxe}_2$  are located at ca. 241 nm (S<sub>2</sub>) and 228 nm (S<sub>5</sub>). Both of the high excited states are attributed to the  $\pi \rightarrow \pi^*$  transition, but the charge-transfer characteristic of  ${}^1\text{Oxe}_2$  is more obvious than that of  ${}^1\text{Oxe}_1$ . The charge-transfer excited states of  ${}^1\text{Oxe}_2$  possess the large dipole moments and solvent reorganization energies, which emphasizes the significance of solvation effect on the regio-isomerism of vertical excitation processes for head-to-head and head-to-tail oxetanes in acetonitrile.

**Table S6.** The main hole and electron NTO (Isovalue =  $0.05 \text{ e} \cdot \text{\AA}^{-3}$ ) for photoexcited bright states of  $^1\text{Oxe}_1$  and  $^1\text{Oxe}_2$ .  $w$  denotes the square of the singular value for a given NTO pair, i.e. the associated weight for each NTO pair.

| Geometry         | Excited State | Nature         | $w$   | Hole-NTO                                                                             | Electron-NTO                                                                          |
|------------------|---------------|----------------|-------|--------------------------------------------------------------------------------------|---------------------------------------------------------------------------------------|
| $^1\text{Oxe}_1$ | $S_1$         | $^1(n\pi^*)$   | 99.2% | 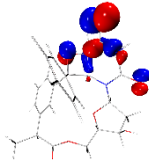   |    |
|                  | $S_2$         | $^1(\pi\pi^*)$ | 97.4% |    |    |
| $^1\text{Oxe}_2$ | $S_1$         | $^1(\pi\pi^*)$ | 99.5% |   |   |
|                  | $S_5$         | $^1(\pi\pi^*)$ | 91.2% |  |  |

**Table S7.** The main hole and electron NTO (Isovalue =  $0.05 \text{ e} \cdot \text{\AA}^{-3}$ ) for  $S_1$  and  $S_2$  excited states of  $\text{CI}^{S_1/S_2}_1$ .  $w$  denotes the square of the singular value for a given NTO pair, i.e. the associated weight for each NTO pair.

| Excited State | Nature              | $w$   | Hole-NTO                                                                          | Electron-NTO                                                                        |
|---------------|---------------------|-------|-----------------------------------------------------------------------------------|-------------------------------------------------------------------------------------|
| $S_1$         | $^1(\text{n}\pi^*)$ | 99.6% | 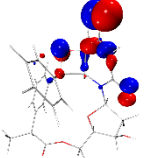 |  |
| $S_2$         | $^1(\pi\pi^*)$      | 99.8% |  |  |

**Table S8.** The main hole and electron NTO (Isovalue =  $0.05 \text{ e} \cdot \text{\AA}^{-3}$ ) for  $T_1$  excited states of  $^3\text{Oxe}_1^*$  and  $^3\text{Oxe}_2^*$ .  $w$  denotes the square of the singular value for a given NTO pair, i.e. the associated weight for each NTO pair.

| Geometry           | Nature         | $w$    | Hole-NTO                                                                            | Electron-NTO                                                                          |
|--------------------|----------------|--------|-------------------------------------------------------------------------------------|---------------------------------------------------------------------------------------|
| $^3\text{Oxe}_1^*$ | $^3(\pi\pi^*)$ | 108.7% | 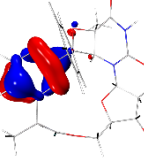 |  |
| $^3\text{Oxe}_2^*$ | $^3(\pi\pi^*)$ | 101.9% |  |  |

## Cartesian Coordinates

<sup>3</sup>BZF\*-Thy

-----

|   |           |           |           |
|---|-----------|-----------|-----------|
| C | -4.630111 | 2.963284  | -0.081413 |
| H | -5.390154 | 2.918659  | 0.704347  |
| H | -4.642515 | 3.966909  | -0.519129 |
| H | -4.894572 | 2.245064  | -0.862514 |
| O | -0.949886 | 2.911126  | -0.023371 |
| C | 0.165041  | 2.870337  | -0.943064 |
| H | 0.178655  | 1.903941  | -1.453049 |
| H | 0.055338  | 3.667694  | -1.684521 |
| O | 1.634831  | 1.966429  | 0.737671  |
| C | 2.682982  | 3.141987  | -1.060955 |
| C | 3.771362  | 2.465631  | -0.207997 |
| H | 2.515324  | 2.570850  | -1.978423 |
| H | 4.327985  | 3.244693  | 0.321774  |
| H | 4.477502  | 1.877167  | -0.796298 |
| O | 2.930975  | 4.510705  | -1.359126 |
| H | 3.543966  | 4.542885  | -2.110113 |
| N | 3.136582  | 0.145235  | 0.665045  |
| C | 2.758830  | -0.459470 | -0.529334 |
| O | 2.356138  | 0.159530  | -1.509694 |
| N | 2.879675  | -1.836059 | -0.527837 |
| H | 2.600495  | -2.294930 | -1.388723 |
| C | 1.440652  | 3.070550  | -0.155947 |
| H | 1.379893  | 4.001856  | 0.424984  |
| C | 3.561990  | -0.614187 | 1.742442  |
| H | 3.810643  | -0.037651 | 2.626585  |
| O | -3.367364 | -3.479414 | 0.810170  |
| C | -3.247124 | 2.642054  | 0.509380  |
| H | -2.995190 | 3.390415  | 1.268424  |
| C | -3.222759 | 1.270441  | 1.185195  |
| C | -3.041058 | 0.108318  | 0.440213  |
| C | -3.448460 | 1.172187  | 2.571129  |
| C | -3.031180 | -1.165780 | 1.060305  |
| H | -2.907008 | 0.174792  | -0.634639 |
| C | -3.495331 | -0.081153 | 3.189391  |
| H | -3.594020 | 2.074809  | 3.158337  |
| C | -3.292161 | -1.242424 | 2.454617  |
| H | -3.674406 | -0.147233 | 4.259044  |
| H | -3.292903 | -2.210579 | 2.943778  |
| C | -2.831584 | -2.377291 | 0.295403  |
| C | -2.109356 | -2.562064 | -0.946079 |
| C | -2.419381 | -3.667617 | -1.784647 |
| C | -1.033762 | -1.715442 | -1.319900 |
| C | -1.710357 | -3.882661 | -2.960799 |
| H | -3.237890 | -4.325141 | -1.511176 |
| C | -0.347086 | -1.932524 | -2.506818 |
| H | -0.737840 | -0.900126 | -0.668169 |

<sup>3</sup>RC<sub>1</sub>\*

-----

|   |           |           |           |
|---|-----------|-----------|-----------|
| C | -0.665646 | 5.007428  | -0.169188 |
| H | -1.174907 | 5.527750  | 0.647630  |
| H | -0.115311 | 5.746117  | -0.761029 |
| H | -1.421211 | 4.549216  | -0.813553 |
| O | 2.125835  | 2.597741  | -0.241004 |
| C | 2.796499  | 1.676194  | -1.130279 |
| H | 2.053962  | 1.133392  | -1.717883 |
| H | 3.455626  | 2.235395  | -1.802776 |
| O | 2.714487  | -0.018538 | 0.570089  |
| C | 4.392015  | -0.305359 | -1.120476 |
| C | 4.258792  | -1.609197 | -0.309487 |
| H | 3.929805  | -0.425576 | -2.103790 |
| H | 5.156577  | -1.722465 | 0.305964  |
| H | 4.155096  | -2.496761 | -0.935491 |
| O | 5.727742  | 0.169380  | -1.251379 |
| H | 6.150461  | -0.335513 | -1.963633 |
| N | 1.841077  | -2.197273 | 0.317411  |
| C | 1.271029  | -2.138859 | -0.950672 |
| O | 1.761930  | -1.525193 | -1.891330 |
| N | 0.089823  | -2.847402 | -1.072266 |
| H | -0.336291 | -2.818750 | -1.992803 |
| C | 3.605184  | 0.717460  | -0.280101 |
| H | 4.315275  | 1.274817  | 0.346009  |
| C | 1.206758  | -2.868450 | 1.349026  |
| H | 1.723040  | -2.817597 | 2.301271  |
| C | 0.287291  | 3.945944  | 0.400050  |
| H | 1.047497  | 4.433615  | 1.019594  |
| C | -0.433040 | 2.918300  | 1.274352  |
| C | -1.252021 | 1.951453  | 0.695222  |
| C | -0.264764 | 2.933927  | 2.670905  |
| C | -1.933983 | 0.996397  | 1.489107  |
| H | -1.346945 | 1.907922  | -0.385158 |
| C | -0.915324 | 1.986039  | 3.467779  |
| H | 0.378696  | 3.680540  | 3.128082  |
| C | -1.735913 | 1.022407  | 2.896397  |
| H | -0.780349 | 2.005520  | 4.545785  |
| H | -2.252554 | 0.300067  | 3.519431  |
| C | 3.047645  | -1.394096 | 0.615736  |
| H | 3.296528  | -1.665425 | 1.644781  |
| C | -0.601889 | -3.561197 | -0.085842 |
| O | -1.659101 | -4.128095 | -0.357774 |
| C | 0.041102  | -3.545311 | 1.220728  |
| C | -0.630965 | -4.261150 | 2.357278  |
| H | -0.045303 | -4.177836 | 3.276986  |
| H | -1.627047 | -3.842211 | 2.540896  |
| H | -0.766739 | -5.324366 | 2.128094  |

|    |           |           |           |              |           |           |           |
|----|-----------|-----------|-----------|--------------|-----------|-----------|-----------|
| C  | -0.676707 | -3.017106 | -3.336011 | C            | 1.023678  | 3.208842  | -0.714678 |
| H  | -1.971421 | -4.724908 | -3.595804 | O            | 0.650835  | 3.131451  | -1.869642 |
| H  | 0.465447  | -1.262689 | -2.774906 | O            | -2.875393 | -1.156611 | 1.617299  |
| H  | -0.128726 | -3.185280 | -4.258398 | C            | -2.738724 | -0.047621 | 0.896125  |
| C  | 3.004504  | 1.609246  | 0.818426  | C            | -3.431088 | -0.059584 | -0.377180 |
| H  | 3.367374  | 1.804917  | 1.830950  | C            | -3.708473 | -1.298741 | -1.017344 |
| C  | 3.314235  | -2.672266 | 0.510338  | C            | -3.914556 | 1.133117  | -0.974222 |
| O  | 3.360038  | -3.888557 | 0.347078  | C            | -4.406299 | -1.327336 | -2.219880 |
| C  | 3.676926  | -1.962824 | 1.730619  | H            | -3.333372 | -2.218877 | -0.581728 |
| C  | 4.149357  | -2.763143 | 2.910754  | C            | -4.592767 | 1.086711  | -2.184203 |
| H  | 4.378874  | -2.114124 | 3.760358  | H            | -3.760324 | 2.084628  | -0.476231 |
| H  | 3.387661  | -3.486638 | 3.223730  | C            | -4.848401 | -0.141244 | -2.815632 |
| H  | 5.049505  | -3.336753 | 2.660706  | H            | -4.596536 | -2.281598 | -2.703765 |
| C  | -2.166854 | 2.712522  | -0.563768 | H            | -4.941209 | 2.011302  | -2.636383 |
| O  | -2.354914 | 2.571874  | -1.757287 | H            | -5.388277 | -0.168087 | -3.757515 |
| CI | $T_1/T_2$ |           |           | ${}^3RC_2^*$ |           |           |           |

|   |           |           |           |   |           |           |           |
|---|-----------|-----------|-----------|---|-----------|-----------|-----------|
| O | 1.724706  | 2.653145  | 0.620211  | O | 1.865226  | 2.369580  | 0.353807  |
| C | 3.052022  | 2.384522  | 0.116719  | C | 3.133857  | 2.147802  | -0.299838 |
| H | 2.983570  | 2.052828  | -0.923882 | H | 2.972263  | 1.506619  | -1.172225 |
| H | 3.644618  | 3.303566  | 0.156882  | H | 3.541145  | 3.104450  | -0.638083 |
| O | 2.896275  | 0.108404  | 0.944448  | O | 3.529596  | 0.271836  | 1.237038  |
| C | 5.117914  | 0.951753  | 0.541531  | C | 5.444239  | 1.143012  | 0.125443  |
| C | 4.900934  | -0.380233 | -0.190397 | C | 5.220712  | -0.308207 | -0.325733 |
| H | 5.531603  | 1.713312  | -0.124247 | H | 5.716660  | 1.792218  | -0.710179 |
| H | 5.791017  | -1.013097 | -0.170701 | H | 6.147996  | -0.883080 | -0.342706 |
| H | 4.617648  | -0.197783 | -1.232444 | H | 4.777115  | -0.334428 | -1.326260 |
| O | 6.037323  | 0.874759  | 1.623000  | O | 6.497684  | 1.291191  | 1.069328  |
| H | 5.721109  | 0.212983  | 2.261179  | H | 6.282413  | 0.770879  | 1.861110  |
| N | 2.905232  | -1.928898 | -0.223476 | N | 3.233617  | -1.800690 | 0.125906  |
| C | 3.072500  | -3.292908 | 0.017524  | C | 3.682976  | -3.114895 | -0.000674 |
| O | 3.840340  | -3.732253 | 0.868741  | O | 4.804334  | -3.457127 | 0.362351  |
| N | 2.311274  | -4.119716 | -0.782759 | N | 2.791458  | -4.003816 | -0.568619 |
| H | 2.431913  | -5.113226 | -0.619683 | H | 3.103179  | -4.966585 | -0.608723 |
| C | 3.679479  | 1.319267  | 0.997319  | C | 4.067376  | 1.508777  | 0.717719  |
| H | 3.702699  | 1.669985  | 2.035596  | H | 4.182873  | 2.185780  | 1.569526  |
| C | 2.054698  | -1.451290 | -1.207233 | C | 2.031437  | -1.343802 | -0.410390 |
| H | 1.962063  | -0.377739 | -1.271139 | H | 1.685508  | -0.402558 | -0.003588 |
| O | -3.210143 | 0.050705  | 2.727842  | O | -2.911205 | -1.028372 | 1.468999  |
| C | -4.989457 | -0.511052 | 1.295741  | C | -5.084816 | -0.741513 | 0.580929  |
| C | -5.883685 | -0.044098 | 0.305410  | C | -6.070028 | 0.194328  | 0.224679  |
| C | -5.388951 | -1.595658 | 2.114654  | C | -5.470434 | -2.056963 | 0.892786  |
| C | -7.110148 | -0.672474 | 0.112109  | C | -7.412611 | -0.182824 | 0.174188  |
| H | -5.622571 | 0.819516  | -0.296790 | H | -5.792757 | 1.221215  | 0.011178  |
| C | -6.615843 | -2.218535 | 1.913179  | C | -6.807690 | -2.435623 | 0.824465  |
| H | -4.711399 | -1.948344 | 2.884858  | H | -4.705331 | -2.770390 | 1.181216  |
| C | -7.481743 | -1.764802 | 0.909508  | C | -7.782216 | -1.497623 | 0.465550  |
| H | -7.785057 | -0.306097 | -0.656386 | H | -8.168736 | 0.550531  | -0.090660 |
| H | -6.899958 | -3.062665 | 2.535312  | H | -7.094151 | -3.458217 | 1.052999  |
| H | -8.439990 | -2.251719 | 0.753439  | H | -8.827090 | -1.791426 | 0.417533  |

|   |           |           |           |   |           |           |           |
|---|-----------|-----------|-----------|---|-----------|-----------|-----------|
| C | 3.716416  | -0.992964 | 0.565073  | C | 4.212637  | -0.850320 | 0.704731  |
| H | 4.042009  | -1.551947 | 1.445353  | H | 4.704796  | -1.392853 | 1.514184  |
| C | 1.426840  | -3.751201 | -1.817255 | C | 1.425602  | -3.762590 | -0.845972 |
| O | 0.837153  | -4.637015 | -2.454085 | O | 0.697477  | -4.712769 | -1.176938 |
| C | 1.302204  | -2.333560 | -2.025724 | C | 1.021580  | -2.397253 | -0.742185 |
| C | 0.395878  | -1.797677 | -3.086811 | C | -0.385249 | -1.992647 | -0.957706 |
| H | -0.320358 | -1.079517 | -2.665558 | H | -0.824174 | -1.583017 | -0.033445 |
| H | 0.966585  | -1.260447 | -3.857301 | H | -0.442996 | -1.182697 | -1.700313 |
| H | -0.154490 | -2.610296 | -3.564611 | H | -0.990357 | -2.838341 | -1.288801 |
| C | -3.693473 | 0.135273  | 1.557464  | C | -3.640039 | -0.380739 | 0.715577  |
| C | -2.928068 | 0.880476  | 0.544577  | C | -3.064553 | 0.764482  | -0.060030 |
| C | -2.027956 | 1.883800  | 0.976517  | C | -2.015108 | 1.493126  | 0.523480  |
| C | -3.009376 | 0.589557  | -0.835188 | C | -3.471228 | 1.073479  | -1.365975 |
| C | -1.275408 | 2.622043  | 0.065665  | C | -1.389648 | 2.536019  | -0.160052 |
| H | -1.954568 | 2.094978  | 2.038557  | H | -1.701050 | 1.234873  | 1.530451  |
| C | -2.251558 | 1.320082  | -1.745718 | C | -2.826940 | 2.092295  | -2.070115 |
| H | -3.648796 | -0.212754 | -1.186551 | H | -4.263154 | 0.504205  | -1.841448 |
| C | -1.394057 | 2.336598  | -1.306306 | C | -1.800469 | 2.822346  | -1.472551 |
| H | -2.322931 | 1.096960  | -2.806461 | H | -3.126497 | 2.316785  | -3.089688 |
| H | -0.811604 | 2.900289  | -2.029569 | H | -1.304404 | 3.610665  | -2.030205 |
| C | 1.021704  | 3.595250  | -0.036332 | C | 1.011908  | 3.217940  | -0.255804 |
| O | 1.457702  | 4.211200  | -0.991331 | O | 1.263217  | 3.791033  | -1.297853 |
| C | -0.375477 | 3.755684  | 0.554566  | C | -0.292923 | 3.350051  | 0.523586  |
| H | -0.275807 | 3.656396  | 1.640313  | H | -0.124474 | 2.923289  | 1.515761  |
| C | -0.957716 | 5.139010  | 0.220690  | C | -0.671049 | 4.836727  | 0.669978  |
| H | -1.054761 | 5.273629  | -0.860447 | H | -0.795804 | 5.308320  | -0.308654 |
| H | -1.948242 | 5.241973  | 0.674127  | H | -1.609882 | 4.928461  | 1.224145  |
| H | -0.313205 | 5.934543  | 0.609010  | H | 0.106814  | 5.381571  | 1.215497  |

$^3\text{TS}_1^*(a)$

|   |           |           |           |
|---|-----------|-----------|-----------|
| C | 4.107671  | -3.266710 | 0.520341  |
| H | 4.255189  | -4.052626 | -0.226727 |
| H | 5.021760  | -3.180742 | 1.117165  |
| H | 3.295307  | -3.571352 | 1.186303  |
| O | 3.646119  | 0.395091  | 0.219855  |
| C | 3.104715  | 1.543322  | 0.911668  |
| H | 2.547025  | 1.212270  | 1.789664  |
| H | 3.932636  | 2.184702  | 1.227420  |
| O | 1.099726  | 1.476394  | -0.416676 |
| C | 1.592732  | 3.589801  | 0.458680  |
| C | 0.384379  | 3.755548  | -0.490588 |
| H | 1.243899  | 3.440770  | 1.487241  |
| H | 0.686741  | 4.385288  | -1.332389 |
| H | -0.480638 | 4.207384  | -0.007610 |
| O | 2.552174  | 4.631097  | 0.387034  |
| H | 2.216828  | 5.382822  | 0.900185  |
| N | -1.212792 | 1.737059  | -0.737071 |
| C | -1.796032 | 1.841285  | 0.541170  |
| O | -1.263532 | 2.418488  | 1.472829  |

$^3\text{IM}_1^*$

|   |           |           |           |
|---|-----------|-----------|-----------|
| C | -3.591198 | -3.725939 | -0.251496 |
| H | -3.643177 | -4.452277 | 0.565347  |
| H | -4.490645 | -3.832526 | -0.866798 |
| H | -2.724673 | -3.967060 | -0.873683 |
| O | -3.701617 | -0.027302 | -0.300750 |
| C | -3.299456 | 1.125143  | -1.077064 |
| H | -2.687612 | 0.800028  | -1.920385 |
| H | -4.198524 | 1.624353  | -1.449260 |
| O | -1.340583 | 1.409129  | 0.282414  |
| C | -2.042737 | 3.361635  | -0.798590 |
| C | -0.877505 | 3.749942  | 0.137210  |
| H | -1.660104 | 3.154572  | -1.805014 |
| H | -1.262686 | 4.418645  | 0.912988  |
| H | -0.060956 | 4.248255  | -0.383127 |
| O | -3.114266 | 4.291210  | -0.837955 |
| H | -2.850129 | 5.026764  | -1.412404 |
| N | 0.925689  | 1.949652  | 0.581240  |
| C | 1.498238  | 2.002257  | -0.677754 |
| O | 0.938552  | 2.431183  | -1.679066 |



|   |           |           |           |   |           |           |           |
|---|-----------|-----------|-----------|---|-----------|-----------|-----------|
| N | -3.045291 | 1.256766  | 0.640698  | N | 2.820090  | 1.551497  | -0.731859 |
| H | -3.490220 | 1.356948  | 1.547758  | H | 3.269293  | 1.683856  | -1.632765 |
| C | 2.223781  | 2.293050  | -0.066246 | C | -2.536337 | 2.057272  | -0.157554 |
| H | 2.809086  | 2.531948  | -0.968000 | H | -3.169837 | 2.312253  | 0.707115  |
| C | -1.808641 | 1.012526  | -1.726303 | C | 1.584963  | 1.374769  | 1.658701  |
| H | -1.276238 | 0.984488  | -2.668549 | H | 1.082538  | 1.445006  | 2.612669  |
| O | -2.313554 | -1.638713 | -1.313053 | O | 2.463225  | -0.934791 | 1.477715  |
| C | 3.781915  | -1.939882 | -0.177636 | C | -3.485083 | -2.306199 | 0.319708  |
| H | 4.615398  | -1.653927 | -0.828836 | H | -4.368609 | -2.087917 | 0.929353  |
| C | 2.514033  | -1.992680 | -1.035421 | C | -2.246731 | -2.086006 | 1.193453  |
| C | 1.269407  | -2.015852 | -0.410659 | C | -0.992642 | -2.009561 | 0.589857  |
| C | 2.584203  | -1.947973 | -2.435836 | C | -2.360489 | -1.879386 | 2.574585  |
| C | 0.058282  | -1.858890 | -1.138339 | C | 0.160738  | -1.600028 | 1.306685  |
| H | 1.235211  | -2.103402 | 0.667539  | H | -0.918350 | -2.210326 | -0.470580 |
| C | 1.397541  | -1.917066 | -3.186174 | C | -1.214636 | -1.586666 | 3.327292  |
| H | 3.549801  | -1.932022 | -2.934346 | H | -3.332316 | -1.940329 | 3.057141  |
| C | 0.161929  | -1.857066 | -2.561841 | C | 0.018949  | -1.428187 | 2.713000  |
| H | 1.450764  | -1.908584 | -4.272166 | H | -1.297451 | -1.454401 | 4.402933  |
| H | -0.748117 | -1.787960 | -3.146565 | H | 0.890123  | -1.169876 | 3.302902  |
| C | -1.227945 | -1.680230 | -0.515004 | C | 1.416837  | -1.335556 | 0.661060  |
| C | -1.483560 | -1.643907 | 0.929217  | C | 1.766432  | -1.589413 | -0.740748 |
| C | -2.703276 | -2.195686 | 1.398978  | C | 3.038781  | -2.135202 | -1.032098 |
| C | -0.623668 | -1.058048 | 1.890188  | C | 0.914127  | -1.290960 | -1.828321 |
| C | -3.018662 | -2.205622 | 2.752745  | C | 3.420903  | -2.407206 | -2.341918 |
| H | -3.387050 | -2.624507 | 0.675051  | H | 3.716808  | -2.349347 | -0.213086 |
| C | -0.951685 | -1.060050 | 3.244031  | C | 1.306530  | -1.558877 | -3.138708 |
| H | 0.273726  | -0.543153 | 1.568712  | H | -0.034609 | -0.796851 | -1.652994 |
| C | -2.142944 | -1.642127 | 3.688995  | C | 2.555109  | -2.126797 | -3.404339 |
| H | -3.952289 | -2.654132 | 3.083009  | H | 4.398054  | -2.841529 | -2.535807 |
| H | -0.278518 | -0.588355 | 3.955290  | H | 0.637102  | -1.307452 | -3.956899 |
| H | -2.392172 | -1.644426 | 4.746446  | H | 2.855573  | -2.336943 | -4.426919 |
| C | 0.118378  | 2.320948  | -1.003374 | C | -0.456135 | 2.409963  | 0.785733  |
| H | 0.211515  | 2.289441  | -2.092959 | H | -0.563733 | 2.473089  | 1.872618  |
| C | -3.752404 | 0.528290  | -0.317666 | C | 3.553963  | 0.876492  | 0.225109  |
| O | -4.884918 | 0.130086  | -0.092514 | O | 4.719111  | 0.571761  | 0.032523  |
| C | -3.018894 | 0.321458  | -1.584968 | C | 2.793425  | 0.530154  | 1.513538  |
| C | -3.812574 | -0.081369 | -2.791183 | C | 3.720168  | 0.645638  | 2.721343  |
| H | -3.151920 | -0.366072 | -3.612775 | H | 3.175338  | 0.382974  | 3.632294  |
| H | -4.464067 | -0.920788 | -2.544540 | H | 4.565531  | -0.034277 | 2.598389  |
| H | -4.441558 | 0.754782  | -3.122766 | H | 4.098332  | 1.667344  | 2.817441  |
| C | 3.580273  | -0.808725 | 0.829852  | C | -3.420193 | -1.254734 | -0.787796 |
| O | 3.325329  | -0.957648 | 2.009187  | O | -3.089657 | -1.471108 | -1.937687 |

ISC  $T_1/S_0$   
1

|   |          |           |          |
|---|----------|-----------|----------|
| C | 4.280328 | -2.978652 | 0.873825 |
| H | 4.480091 | -3.844497 | 0.235094 |
| H | 5.189455 | -2.747919 | 1.438370 |
| H | 3.496172 | -3.248690 | 1.586840 |
| O | 3.564183 | 0.574605  | 0.108110 |

$^1O_{x_1}$

|   |          |           |           |
|---|----------|-----------|-----------|
| C | 4.529404 | -2.588499 | 0.811351  |
| H | 4.715261 | -3.484833 | 0.211982  |
| H | 5.461318 | -2.305874 | 1.311167  |
| H | 3.789489 | -2.832979 | 1.579131  |
| O | 3.570414 | 0.877598  | -0.106288 |

|   |           |           |           |   |           |           |           |
|---|-----------|-----------|-----------|---|-----------|-----------|-----------|
| C | 3.011392  | 1.779638  | 0.689508  | C | 3.063530  | 2.098337  | 0.476796  |
| H | 2.498264  | 1.532585  | 1.620589  | H | 2.756058  | 1.909290  | 1.506850  |
| H | 3.829496  | 2.474308  | 0.901187  | H | 3.868645  | 2.839505  | 0.469450  |
| O | 0.973022  | 1.505108  | -0.553428 | O | 0.841512  | 1.623634  | -0.333991 |
| C | 1.393144  | 3.705445  | 0.077899  | C | 1.290439  | 3.931158  | 0.102172  |
| C | 0.177713  | 3.737244  | -0.877454 | C | -0.182030 | 3.568415  | 0.392950  |
| H | 1.051353  | 3.632229  | 1.118804  | H | 1.786070  | 4.312441  | 1.004122  |
| H | 0.470705  | 4.272381  | -1.785963 | H | -0.859573 | 4.397035  | 0.182840  |
| H | -0.693139 | 4.220778  | -0.443254 | H | -0.304406 | 3.269660  | 1.435166  |
| O | 2.308794  | 4.774900  | -0.085423 | O | 1.440754  | 4.855549  | -0.972996 |
| H | 1.925338  | 5.564320  | 0.327564  | H | 1.134639  | 5.721843  | -0.659241 |
| N | -1.341107 | 1.608648  | -0.918369 | N | -1.477326 | 1.425068  | -0.303050 |
| C | -2.126035 | 1.973628  | 0.163731  | C | -2.605223 | 1.760918  | 0.405353  |
| O | -1.878637 | 2.884204  | 0.944120  | O | -2.744872 | 2.758130  | 1.099054  |
| N | -3.304130 | 1.226976  | 0.298068  | N | -3.682348 | 0.857437  | 0.299980  |
| H | -3.903363 | 1.541710  | 1.055279  | H | -4.463667 | 1.094483  | 0.903433  |
| C | 2.071722  | 2.390701  | -0.330028 | C | 1.905753  | 2.587752  | -0.373493 |
| H | 2.620630  | 2.559737  | -1.270144 | H | 2.238855  | 2.719543  | -1.411605 |
| C | -1.555021 | 0.416812  | -1.592401 | C | -1.405670 | 0.207302  | -1.087213 |
| H | -0.888724 | 0.231608  | -2.423248 | H | -0.767727 | 0.400647  | -1.949781 |
| O | -2.287248 | -1.777974 | -1.098103 | O | -2.145101 | -1.779643 | -1.228936 |
| C | 3.850029  | -1.782978 | 0.012381  | C | 4.024066  | -1.452426 | -0.091214 |
| H | 4.648370  | -1.537068 | -0.697073 | H | 4.790424  | -1.221335 | -0.841439 |
| C | 2.578338  | -2.057301 | -0.795222 | C | 2.742869  | -1.823725 | -0.839303 |
| C | 1.335476  | -1.940412 | -0.178014 | C | 1.493642  | -1.508078 | -0.298513 |
| C | 2.639033  | -2.384938 | -2.157023 | C | 2.796658  | -2.480082 | -2.074849 |
| C | 0.124488  | -2.012820 | -0.910262 | C | 0.306622  | -1.758733 | -0.993904 |
| H | 1.300170  | -1.722384 | 0.881508  | H | 1.447459  | -1.020542 | 0.667180  |
| C | 1.451945  | -2.581448 | -2.875975 | C | 1.616540  | -2.793786 | -2.750322 |
| H | 3.601406  | -2.481390 | -2.652948 | H | 3.758668  | -2.738178 | -2.511135 |
| C | 0.213233  | -2.384516 | -2.279351 | C | 0.376597  | -2.419315 | -2.227137 |
| H | 1.502093  | -2.860074 | -3.925327 | H | 1.662199  | -3.311729 | -3.704564 |
| H | -0.697003 | -2.497450 | -2.857810 | H | -0.535196 | -2.633128 | -2.772981 |
| C | -1.129720 | -1.638690 | -0.314556 | C | -1.019109 | -1.211321 | -0.478755 |
| C | -1.369672 | -1.419917 | 1.119153  | C | -1.227418 | -1.403341 | 1.019171  |
| C | -2.459460 | -2.076990 | 1.733834  | C | -1.996386 | -2.488651 | 1.463586  |
| C | -0.578761 | -0.561552 | 1.914411  | C | -0.647476 | -0.550832 | 1.971438  |
| C | -2.719242 | -1.914315 | 3.091362  | C | -2.179487 | -2.719991 | 2.827283  |
| H | -3.090934 | -2.721920 | 1.132492  | H | -2.459047 | -3.143526 | 0.733224  |
| C | -0.848537 | -0.399083 | 3.272617  | C | -0.835366 | -0.782909 | 3.336477  |
| H | 0.210638  | 0.019468  | 1.451350  | H | -0.054592 | 0.298522  | 1.650402  |
| C | -1.911612 | -1.080129 | 3.871014  | C | -1.600135 | -1.867077 | 3.769710  |
| H | -3.553575 | -2.442929 | 3.544578  | H | -2.778194 | -3.566586 | 3.152539  |
| H | -0.230974 | 0.272830  | 3.862519  | H | -0.383060 | -0.110044 | 4.059984  |
| H | -2.117099 | -0.953539 | 4.930083  | H | -1.745755 | -2.044598 | 4.831714  |
| C | -0.051052 | 2.248420  | -1.225809 | C | -0.373374 | 2.359205  | -0.521660 |
| H | 0.063727  | 2.107266  | -2.305439 | H | -0.420248 | 2.690005  | -1.571901 |
| C | -3.715676 | 0.084095  | -0.360718 | C | -3.870842 | -0.203315 | -0.558435 |
| O | -4.775173 | -0.456128 | -0.090307 | O | -4.896534 | -0.863675 | -0.554882 |
| C | -2.772401 | -0.441013 | -1.457165 | C | -2.711317 | -0.473562 | -1.519686 |

|   |           |           |           |   |           |           |           |
|---|-----------|-----------|-----------|---|-----------|-----------|-----------|
| C | -3.566043 | -0.619612 | -2.755227 | C | -3.171510 | -0.346164 | -2.960558 |
| H | -2.906580 | -0.999913 | -3.540217 | H | -2.351334 | -0.599082 | -3.638233 |
| H | -4.380705 | -1.329627 | -2.589368 | H | -4.011903 | -1.022317 | -3.142486 |
| H | -3.990710 | 0.334618  | -3.081824 | H | -3.499493 | 0.678249  | -3.169520 |
| C | 3.604556  | -0.540308 | 0.869049  | C | 3.793015  | -0.173980 | 0.712196  |
| O | 3.409129  | -0.548923 | 2.068903  | O | 3.766338  | -0.106320 | 1.924859  |

 ${}^3\text{TS}_1^*(b)$ 

|   |           |           |           |
|---|-----------|-----------|-----------|
| C | 4.190300  | -3.024863 | 0.833382  |
| H | 4.297713  | -3.914189 | 0.204768  |
| H | 5.154953  | -2.821459 | 1.310993  |
| H | 3.458539  | -3.239610 | 1.616816  |
| O | 3.680882  | 0.539889  | 0.069240  |
| C | 3.159733  | 1.785835  | 0.588742  |
| H | 2.692388  | 1.608787  | 1.558857  |
| H | 3.994013  | 2.482639  | 0.704924  |
| O | 1.092328  | 1.395101  | -0.554905 |
| C | 1.466984  | 3.639091  | -0.076459 |
| C | 0.227949  | 3.578122  | -0.998013 |
| H | 1.153652  | 3.616451  | 0.976101  |
| H | 0.493028  | 4.036637  | -1.955586 |
| H | -0.637128 | 4.089265  | -0.584088 |
| O | 2.342615  | 4.724717  | -0.327255 |
| H | 1.939354  | 5.525742  | 0.042556  |
| N | -1.246209 | 1.432782  | -0.795551 |
| C | -2.070334 | 1.940870  | 0.193095  |
| O | -1.821895 | 2.908039  | 0.900091  |
| N | -3.303380 | 1.282231  | 0.319212  |
| H | -3.903105 | 1.675002  | 1.038262  |
| C | 2.171053  | 2.322675  | -0.427462 |
| H | 2.682189  | 2.446861  | -1.395641 |
| C | -1.461956 | 0.131302  | -1.305638 |
| H | -0.886418 | -0.021185 | -2.214333 |
| O | -2.449934 | -1.784806 | -0.966072 |
| C | 3.739650  | -1.830769 | -0.020366 |
| H | 4.505525  | -1.607896 | -0.770459 |
| C | 2.419785  | -2.078300 | -0.756506 |
| C | 1.235253  | -2.075873 | -0.089850 |
| C | 2.434377  | -2.309279 | -2.191586 |
| C | -0.051015 | -2.149358 | -0.806944 |
| H | 1.220824  | -1.932411 | 0.984498  |
| C | 1.213286  | -2.622306 | -2.874580 |
| H | 3.379114  | -2.326621 | -2.724892 |
| C | 0.015352  | -2.593639 | -2.229191 |
| H | 1.260127  | -2.912107 | -3.921718 |
| H | -0.905818 | -2.861361 | -2.734779 |
| C | -1.189573 | -1.415150 | -0.342129 |
| C | -1.342466 | -1.197312 | 1.148807  |
| C | -2.324500 | -1.924720 | 1.840455  |

 ${}^3\text{Oxe}_1^*$ 

|   |           |           |           |
|---|-----------|-----------|-----------|
| C | 4.852172  | -2.223535 | -0.440114 |
| H | 4.929594  | -3.056075 | -1.145785 |
| H | 5.797846  | -1.672355 | -0.461917 |
| H | 4.721991  | -2.627483 | 0.567936  |
| O | 3.429828  | 1.030226  | -0.401821 |
| C | 2.927901  | 2.145092  | 0.372198  |
| H | 2.557671  | 1.780851  | 1.332249  |
| H | 3.743864  | 2.852804  | 0.542120  |
| O | 0.872408  | 1.769430  | -0.769506 |
| C | 0.993525  | 3.874315  | 0.228419  |
| C | -0.304053 | 3.832380  | -0.605229 |
| H | 0.779979  | 3.580657  | 1.264597  |
| H | -0.159198 | 4.464497  | -1.487334 |
| H | -1.177979 | 4.179152  | -0.059021 |
| O | 1.695184  | 5.104940  | 0.176445  |
| H | 1.229785  | 5.737520  | 0.745878  |
| N | -1.451895 | 1.498100  | -0.541022 |
| C | -2.148744 | 1.757877  | 0.615467  |
| O | -1.874216 | 2.618925  | 1.439695  |
| N | -3.304682 | 0.975192  | 0.801686  |
| H | -3.811872 | 1.194352  | 1.653511  |
| C | 1.827142  | 2.784585  | -0.455888 |
| H | 2.257905  | 3.199091  | -1.380439 |
| C | -1.635605 | 0.238390  | -1.230654 |
| H | -1.245824 | 0.346356  | -2.243846 |
| O | -2.499314 | -1.698107 | -1.048580 |
| C | 3.692943  | -1.294014 | -0.820970 |
| H | 3.911504  | -0.825552 | -1.785594 |
| C | 2.314022  | -1.972639 | -0.936054 |
| C | 1.266277  | -1.293085 | -1.498752 |
| C | 2.112991  | -3.337122 | -0.530058 |
| C | -0.099116 | -1.885719 | -1.449520 |
| H | 1.405650  | -0.297664 | -1.908095 |
| C | 0.902710  | -4.034507 | -0.885766 |
| H | 2.925015  | -3.898524 | -0.084355 |
| C | -0.153431 | -3.373574 | -1.427674 |
| H | 0.877648  | -5.116467 | -0.771955 |
| H | -1.043388 | -3.892187 | -1.771154 |
| C | -1.183519 | -1.168610 | -0.652933 |
| C | -0.973666 | -1.309562 | 0.848453  |
| C | -1.699976 | -2.276296 | 1.561782  |

|   |           |           |           |   |           |           |           |
|---|-----------|-----------|-----------|---|-----------|-----------|-----------|
| C | -0.521576 | -0.315547 | 1.867164  | C | -0.003891 | -0.553506 | 1.524075  |
| C | -2.474854 | -1.780535 | 3.219517  | C | -1.465911 | -2.476391 | 2.922665  |
| H | -2.970405 | -2.598779 | 1.288243  | H | -2.456851 | -2.857583 | 1.046923  |
| C | -0.677693 | -0.170594 | 3.248318  | C | 0.225124  | -0.755258 | 2.886481  |
| H | 0.228460  | 0.267439  | 1.344061  | H | 0.561562  | 0.197747  | 0.986413  |
| C | -1.652081 | -0.901752 | 3.929367  | C | -0.502203 | -1.717018 | 3.591114  |
| H | -3.236019 | -2.355894 | 3.739769  | H | -2.039518 | -3.226310 | 3.461237  |
| H | -0.036134 | 0.519905  | 3.789149  | H | 0.979401  | -0.160074 | 3.393859  |
| H | -1.772391 | -0.786258 | 5.003062  | H | -0.321294 | -1.872317 | 4.651305  |
| C | 0.009416  | 2.062880  | -1.217423 | C | -0.398370 | 2.364450  | -1.070666 |
| H | 0.074803  | 1.838522  | -2.287786 | H | -0.535996 | 2.328532  | -2.156742 |
| C | -3.793416 | 0.169024  | -0.339595 | C | -3.866002 | 0.014870  | -0.015383 |
| O | -4.904574 | -0.274412 | -0.099426 | O | -4.931357 | -0.513846 | 0.256155  |
| C | -2.857259 | -0.451573 | -1.384748 | C | -3.046448 | -0.367486 | -1.256050 |
| C | -3.542511 | -0.502450 | -2.742540 | C | -3.878699 | -0.270075 | -2.518783 |
| H | -2.883878 | -0.977504 | -3.474818 | H | -3.299564 | -0.632525 | -3.372767 |
| H | -4.469807 | -1.077851 | -2.665768 | H | -4.784811 | -0.873838 | -2.415006 |
| H | -3.788289 | 0.507185  | -3.088537 | H | -4.173632 | 0.768766  | -2.704168 |
| C | 3.547689  | -0.573612 | 0.824185  | C | 3.557576  | -0.169162 | 0.206501  |
| O | 3.257112  | -0.565951 | 2.004664  | O | 3.531224  | -0.329169 | 1.410303  |

${}^1\text{Oxe}_1^*$

|   |           |           |           |
|---|-----------|-----------|-----------|
| C | 4.466178  | -2.641266 | 0.750682  |
| H | 4.650216  | -3.515519 | 0.118973  |
| H | 5.388995  | -2.400974 | 1.288177  |
| H | 3.699468  | -2.901381 | 1.486358  |
| O | 3.610860  | 0.878681  | -0.051720 |
| C | 3.097461  | 2.086269  | 0.552889  |
| H | 2.806234  | 1.882363  | 1.584766  |
| H | 3.895980  | 2.834149  | 0.540613  |
| O | 0.857721  | 1.613372  | -0.211119 |
| C | 1.321505  | 3.923439  | 0.193856  |
| C | -0.156460 | 3.577166  | 0.475908  |
| H | 1.815394  | 4.298364  | 1.099495  |
| H | -0.825580 | 4.407939  | 0.246884  |
| H | -0.291435 | 3.295345  | 1.520747  |
| O | 1.492691  | 4.846448  | -0.879510 |
| H | 1.199053  | 5.717153  | -0.566141 |
| N | -1.468768 | 1.440532  | -0.206697 |
| C | -2.591229 | 1.789946  | 0.523467  |
| O | -2.674053 | 2.765490  | 1.273888  |
| N | -3.694972 | 0.978566  | 0.354558  |
| H | -4.474941 | 1.232453  | 0.948975  |
| C | 1.924056  | 2.572222  | -0.277347 |
| H | 2.239878  | 2.695265  | -1.322332 |
| C | -1.437373 | 0.258975  | -1.038444 |
| H | -0.842020 | 0.483372  | -1.926007 |
| O | -2.133036 | -1.716161 | -1.339265 |
| C | 4.012047  | -1.457215 | -0.116171 |

$\text{Cl}_1^{S_1/S_2}$

|   |           |           |           |
|---|-----------|-----------|-----------|
| C | 4.319130  | -2.815238 | 0.839570  |
| H | 4.471764  | -3.704867 | 0.220899  |
| H | 5.246403  | -2.607330 | 1.383357  |
| H | 3.533670  | -3.031886 | 1.569882  |
| O | 3.659356  | 0.732647  | -0.018001 |
| C | 3.200539  | 1.979183  | 0.558202  |
| H | 2.923038  | 1.819673  | 1.601421  |
| H | 4.025953  | 2.694601  | 0.502351  |
| O | 0.928707  | 1.567999  | -0.131978 |
| C | 1.484058  | 3.874180  | 0.134804  |
| C | -0.033440 | 3.630279  | 0.317809  |
| H | 1.931566  | 4.229911  | 1.071672  |
| H | -0.628394 | 4.469069  | -0.052471 |
| H | -0.271086 | 3.463401  | 1.367054  |
| O | 1.804729  | 4.763578  | -0.931137 |
| H | 1.560036  | 5.660232  | -0.648088 |
| N | -1.411317 | 1.504944  | -0.285844 |
| C | -2.420531 | 1.751812  | 0.626463  |
| O | -2.384072 | 2.589869  | 1.536438  |
| N | -3.547089 | 0.975615  | 0.454039  |
| H | -4.292422 | 1.171075  | 1.111996  |
| C | 2.028445  | 2.475003  | -0.266418 |
| H | 2.325614  | 2.533400  | -1.323500 |
| C | -1.432852 | 0.309129  | -1.104398 |
| H | -0.794633 | 0.480636  | -1.973070 |
| O | -2.231542 | -1.657802 | -1.257617 |
| C | 3.925833  | -1.625450 | -0.049517 |

|   |           |           |           |   |           |           |           |
|---|-----------|-----------|-----------|---|-----------|-----------|-----------|
| H | 4.803022  | -1.212863 | -0.835740 | H | 4.733219  | -1.428189 | -0.765113 |
| C | 2.742364  | -1.763406 | -0.911287 | C | 2.651605  | -1.893531 | -0.852537 |
| C | 1.486860  | -1.492249 | -0.360471 | C | 1.401459  | -1.562628 | -0.320105 |
| C | 2.811813  | -2.311172 | -2.197671 | C | 2.711170  | -2.466733 | -2.128511 |
| C | 0.308921  | -1.685234 | -1.088533 | C | 0.223532  | -1.718748 | -1.058371 |
| H | 1.429142  | -1.085628 | 0.641694  | H | 1.351741  | -1.133928 | 0.673276  |
| C | 1.640380  | -2.563603 | -2.912878 | C | 1.536288  | -2.685952 | -2.851250 |
| H | 3.779368  | -2.532707 | -2.641568 | H | 3.673649  | -2.733739 | -2.558304 |
| C | 0.394021  | -2.236422 | -2.374178 | C | 0.298165  | -2.299110 | -2.331309 |
| H | 1.697762  | -2.997265 | -3.907590 | H | 1.586114  | -3.139772 | -3.837500 |
| H | -0.509875 | -2.405518 | -2.948159 | H | -0.606808 | -2.441590 | -2.912532 |
| C | -1.023993 | -1.191922 | -0.536393 | C | -1.085661 | -1.145316 | -0.539375 |
| C | -1.232679 | -1.508315 | 0.938959  | C | -1.309742 | -1.380270 | 0.952417  |
| C | -1.939479 | -2.666742 | 1.294908  | C | -2.089105 | -2.494646 | 1.336926  |
| C | -0.692268 | -0.705414 | 1.954671  | C | -0.753549 | -0.562536 | 1.949303  |
| C | -2.104859 | -3.014599 | 2.634886  | C | -2.308815 | -2.779852 | 2.683575  |
| H | -2.367783 | -3.286911 | 0.514674  | H | -2.511156 | -3.131510 | 0.567889  |
| C | -0.864187 | -1.054285 | 3.297539  | C | -0.968032 | -0.857916 | 3.294928  |
| H | -0.139960 | 0.192720  | 1.701230  | H | -0.143559 | 0.291142  | 1.677994  |
| C | -1.569210 | -2.207529 | 3.642840  | C | -1.752951 | -1.961417 | 3.668553  |
| H | -2.656530 | -3.914846 | 2.892097  | H | -2.910350 | -3.640336 | 2.961516  |
| H | -0.444620 | -0.418223 | 4.072254  | H | -0.520837 | -0.228965 | 4.059250  |
| H | -1.702090 | -2.475806 | 4.687323  | H | -1.920356 | -2.176776 | 4.719797  |
| C | -0.352398 | 2.354835  | -0.420466 | C | -0.237196 | 2.337913  | -0.475612 |
| H | -0.380238 | 2.672342  | -1.476392 | H | -0.180857 | 2.562503  | -1.552445 |
| C | -3.810995 | -0.214512 | -0.379653 | C | -3.888783 | 0.217656  | -0.684925 |
| O | -5.035431 | -0.612093 | -0.634216 | O | -5.108540 | -0.214192 | -0.776275 |
| C | -2.758203 | -0.415704 | -1.477295 | C | -2.790997 | -0.238623 | -1.559144 |
| C | -3.291486 | -0.190993 | -2.882866 | C | -3.179945 | -0.230551 | -3.032462 |
| H | -2.490489 | -0.320114 | -3.616935 | H | -2.387037 | -0.663468 | -3.648260 |
| H | -4.091585 | -0.902698 | -3.103597 | H | -4.098038 | -0.811317 | -3.166979 |
| H | -3.696983 | 0.821951  | -2.973768 | H | -3.366303 | 0.797339  | -3.361123 |
| C | 3.782703  | -0.207818 | 0.732152  | C | 3.745567  | -0.353440 | 0.778073  |
| O | 3.715605  | -0.188658 | 1.944984  | O | 3.651546  | -0.316630 | 1.990224  |

${}^1\text{IM}_1^*$

|       |           |           |           |
|-------|-----------|-----------|-----------|
| ----- |           |           |           |
| C     | -4.330171 | -2.928519 | -1.017425 |
| H     | -4.661630 | -3.718542 | -0.336368 |
| H     | -5.124705 | -2.747277 | -1.749208 |
| H     | -3.448576 | -3.286193 | -1.556978 |
| O     | -3.611443 | 0.666195  | -0.485769 |
| C     | -2.892559 | 1.787478  | -1.041821 |
| H     | -2.297735 | 1.459757  | -1.896197 |
| H     | -3.621167 | 2.535734  | -1.367561 |
| O     | -0.951672 | 1.474765  | 0.361075  |
| C     | -1.337586 | 3.704323  | -0.288611 |
| C     | -0.138123 | 3.697017  | 0.687964  |
| H     | -0.982576 | 3.688451  | -1.324248 |
| H     | -0.421513 | 4.235104  | 1.596562  |

$\text{ISC}^{S_1/T_1}_1$

|       |           |           |           |
|-------|-----------|-----------|-----------|
| ----- |           |           |           |
| C     | 0.766506  | 4.839190  | -0.141317 |
| H     | 0.407342  | 5.431534  | 0.705992  |
| H     | 1.452750  | 5.459280  | -0.728759 |
| H     | -0.088089 | 4.589634  | -0.775649 |
| O     | 3.042663  | 1.979298  | -0.408844 |
| C     | 3.402072  | 0.842118  | -1.217641 |
| H     | 2.591191  | 0.617516  | -1.912688 |
| H     | 4.311420  | 1.074246  | -1.780661 |
| O     | 2.455907  | -0.558317 | 0.482674  |
| C     | 4.017648  | -1.645209 | -0.964913 |
| C     | 3.346135  | -2.703532 | -0.054661 |
| H     | 3.590182  | -1.682739 | -1.970344 |
| H     | 4.095257  | -3.084046 | 0.644746  |

|   |           |           |           |   |           |           |           |
|---|-----------|-----------|-----------|---|-----------|-----------|-----------|
| H | 0.757630  | 4.162862  | 0.276459  | H | 2.931024  | -3.549564 | -0.604286 |
| O | -2.258452 | 4.760082  | -0.077466 | O | 5.430982  | -1.747329 | -1.015092 |
| H | -1.917612 | 5.550494  | -0.524442 | H | 5.659737  | -2.417357 | -1.677999 |
| N | 1.381858  | 1.628528  | 0.650772  | N | 0.849101  | -2.251761 | 0.438867  |
| C | 1.853723  | 1.780692  | -0.694645 | C | 0.396145  | -2.214065 | -0.932306 |
| O | 1.196480  | 2.343226  | -1.542119 | O | 1.154036  | -1.946696 | -1.833181 |
| N | 3.105810  | 1.259146  | -0.915717 | N | -0.929614 | -2.521912 | -1.104493 |
| H | 3.446128  | 1.343021  | -1.869216 | H | -1.257542 | -2.510281 | -2.066845 |
| C | -2.028183 | 2.377617  | 0.052912  | C | 3.659907  | -0.317556 | -0.275021 |
| H | -2.644124 | 2.532467  | 0.951170  | H | 4.463297  | -0.062469 | 0.427664  |
| C | 2.100668  | 0.979678  | 1.576420  | C | 0.008240  | -2.447528 | 1.447448  |
| H | 1.647248  | 0.878384  | 2.553673  | H | 0.423782  | -2.407112 | 2.446779  |
| O | 1.815822  | -1.919038 | 1.825612  | O | -3.443273 | 0.086126  | 1.882430  |
| C | -4.013379 | -1.656551 | -0.221117 | C | 1.472468  | 3.575555  | 0.368132  |
| H | -4.915999 | -1.316245 | 0.298926  | H | 2.349076  | 3.861888  | 0.958187  |
| C | -2.907523 | -1.834807 | 0.824022  | C | 0.591336  | 2.673724  | 1.242636  |
| C | -1.591046 | -1.994620 | 0.392736  | C | -0.595788 | 2.150757  | 0.729121  |
| C | -3.188090 | -1.745313 | 2.195120  | C | 1.005325  | 2.331713  | 2.541392  |
| C | -0.494512 | -1.951402 | 1.290466  | C | -1.416638 | 1.253961  | 1.466912  |
| H | -1.410341 | -2.106144 | -0.668472 | H | -0.904472 | 2.462968  | -0.260485 |
| C | -2.127639 | -1.807293 | 3.111983  | C | 0.200897  | 1.475690  | 3.305662  |
| H | -4.211027 | -1.616909 | 2.539101  | H | 1.932644  | 2.729746  | 2.944250  |
| C | -0.812359 | -1.888439 | 2.678221  | C | -0.975258 | 0.948497  | 2.788961  |
| H | -2.338064 | -1.758212 | 4.178464  | H | 0.502894  | 1.220322  | 4.319682  |
| H | 0.006819  | -1.885606 | 3.388730  | H | -1.610089 | 0.310985  | 3.393313  |
| C | 0.908278  | -1.920827 | 0.895836  | C | -2.688650 | 0.675021  | 1.021595  |
| C | 1.377149  | -1.923674 | -0.505464 | C | -3.153085 | 0.745425  | -0.386012 |
| C | 2.623876  | -2.546947 | -0.775160 | C | -4.545129 | 0.615088  | -0.621923 |
| C | 0.727165  | -1.298506 | -1.599275 | C | -2.328668 | 0.833926  | -1.536297 |
| C | 3.160338  | -2.584350 | -2.057000 | C | -5.080085 | 0.615455  | -1.905008 |
| H | 3.149335  | -3.013745 | 0.051465  | H | -5.189503 | 0.510152  | 0.244861  |
| C | 1.275242  | -1.330934 | -2.881556 | C | -2.865767 | 0.820829  | -2.824413 |
| H | -0.185253 | -0.736624 | -1.440203 | H | -1.249956 | 0.872984  | -1.431588 |
| C | 2.489186  | -1.979695 | -3.128482 | C | -4.245421 | 0.722642  | -3.026748 |
| H | 4.108764  | -3.089429 | -2.226246 | H | -6.156530 | 0.526200  | -2.038041 |
| H | 0.753045  | -0.828945 | -3.692947 | H | -2.194501 | 0.875065  | -3.679329 |
| H | 2.908305  | -2.007094 | -4.130468 | H | -4.660571 | 0.717619  | -4.031055 |
| C | 0.053981  | 2.201147  | 1.027551  | C | 2.295094  | -1.917969 | 0.745373  |
| H | -0.005906 | 2.032872  | 2.106351  | H | 2.370671  | -2.119691 | 1.816277  |
| C | 3.935859  | 0.596361  | -0.012178 | C | -1.877864 | -2.790593 | -0.122368 |
| O | 5.038368  | 0.188718  | -0.339174 | O | -3.030806 | -3.064886 | -0.391964 |
| C | 3.373317  | 0.456262  | 1.340669  | C | -1.364672 | -2.709539 | 1.264376  |
| C | 4.209204  | -0.115273 | 2.423457  | C | -2.305521 | -2.831109 | 2.382332  |
| H | 3.590637  | -0.495050 | 3.236514  | H | -2.828101 | -1.851144 | 2.440219  |
| H | 4.844271  | -0.910876 | 2.028924  | H | -3.070983 | -3.581172 | 2.163821  |
| H | 4.875351  | 0.665976  | 2.818018  | H | -1.805898 | -3.033208 | 3.330439  |
| C | -3.559098 | -0.520421 | -1.134945 | C | 1.964744  | 2.708445  | -0.783803 |
| O | -3.144264 | -0.651444 | -2.270315 | O | 1.439835  | 2.620395  | -1.877045 |

$^3\text{TS}_2^*(a)$

-----

${}^3\text{IM}_2^*$ 

|   |           |           |           |   |           |           |           |
|---|-----------|-----------|-----------|---|-----------|-----------|-----------|
| O | -3.313485 | -0.476488 | 0.298604  | O | -3.531594 | 0.177197  | 0.343592  |
| C | -3.421718 | 0.516382  | -0.741514 | C | -3.459590 | 1.209442  | -0.658069 |
| H | -2.608800 | 0.341094  | -1.454841 | H | -2.858955 | 0.835586  | -1.493847 |
| H | -4.374907 | 0.406471  | -1.264730 | H | -4.461387 | 1.445440  | -1.028615 |
| O | -2.207764 | 2.043354  | 0.763528  | O | -1.620470 | 2.120726  | 0.674035  |
| C | -3.122416 | 2.972989  | -1.243953 | C | -2.440956 | 3.469969  | -1.126984 |
| C | -1.597184 | 3.170415  | -1.209823 | C | -0.929920 | 3.236584  | -1.257211 |
| H | -3.458053 | 2.608140  | -2.217853 | H | -2.976292 | 3.289070  | -2.068157 |
| H | -1.295441 | 4.142323  | -1.598459 | H | -0.398459 | 4.097095  | -1.665585 |
| H | -1.092041 | 2.384901  | -1.781450 | H | -0.718358 | 2.357571  | -1.875595 |
| O | -3.862200 | 4.166291  | -1.027087 | O | -2.744918 | 4.766210  | -0.616010 |
| H | -3.623090 | 4.538898  | -0.162631 | H | -2.459773 | 5.416541  | -1.278497 |
| N | 0.094010  | 2.504661  | 0.577781  | N | 0.717936  | 2.244417  | 0.435310  |
| C | 1.138449  | 3.380555  | 0.265415  | C | 1.850498  | 2.988465  | 0.195233  |
| O | 0.938347  | 4.472847  | -0.248148 | O | 1.823061  | 4.127061  | -0.260214 |
| N | 2.407481  | 2.920443  | 0.572272  | N | 3.057997  | 2.376224  | 0.526165  |
| H | 3.161263  | 3.564524  | 0.360291  | H | 3.880334  | 2.948299  | 0.368979  |
| C | -3.333919 | 1.911420  | -0.138018 | C | -2.834873 | 2.450462  | -0.038359 |
| H | -4.237278 | 2.126112  | 0.441046  | H | -3.530108 | 2.910228  | 0.671530  |
| C | 0.311938  | 1.267056  | 1.111872  | C | 0.771228  | 0.854899  | 0.797583  |
| H | -0.571058 | 0.718204  | 1.389697  | H | -0.128287 | 0.622321  | 1.364503  |
| O | 0.745638  | 0.013470  | -0.815985 | O | 0.698191  | 0.070645  | -0.456901 |
| C | 2.835285  | -1.123972 | -0.835741 | C | 2.474047  | -1.531225 | -0.747532 |
| C | 3.665134  | -2.081884 | -0.216441 | C | 3.154828  | -2.684062 | -0.283885 |
| C | 3.448148  | -0.124124 | -1.621948 | C | 3.211858  | -0.597999 | -1.517931 |
| C | 5.048349  | -2.047333 | -0.390603 | C | 4.494847  | -2.897010 | -0.594349 |
| H | 3.231336  | -2.835921 | 0.431792  | H | 2.640723  | -3.391350 | 0.357687  |
| C | 4.827444  | -0.097757 | -1.800290 | C | 4.548812  | -0.821413 | -1.827864 |
| H | 2.816901  | 0.623203  | -2.091437 | H | 2.711383  | 0.293308  | -1.879443 |
| C | 5.636968  | -1.062167 | -1.188156 | C | 5.200126  | -1.973429 | -1.372624 |
| H | 5.669211  | -2.788531 | 0.105802  | H | 4.995914  | -3.783141 | -0.214169 |
| H | 5.276176  | 0.674496  | -2.419834 | H | 5.086729  | -0.095468 | -2.431780 |
| H | 6.714345  | -1.041165 | -1.326881 | H | 6.245343  | -2.144460 | -1.613668 |
| C | -1.280430 | 2.994421  | 0.279166  | C | -0.562367 | 2.942190  | 0.198110  |
| H | -1.380876 | 3.937848  | 0.829401  | H | -0.522491 | 3.877287  | 0.768449  |
| C | 2.726749  | 1.829583  | 1.402538  | C | 3.213172  | 1.274453  | 1.367261  |
| O | 3.887223  | 1.661225  | 1.785874  | O | 4.313331  | 0.992661  | 1.844256  |
| C | 1.605338  | 0.986759  | 1.737951  | C | 1.988966  | 0.534020  | 1.614293  |
| C | 1.731529  | -0.089849 | 2.749973  | C | 1.933730  | -0.487208 | 2.693736  |
| H | 1.236655  | 0.211615  | 3.687842  | H | 2.941285  | -0.765152 | 3.009018  |
| H | 1.229177  | -1.007567 | 2.420674  | H | 1.400143  | -0.083719 | 3.569204  |
| H | 2.781192  | -0.295427 | 2.966596  | H | 1.385688  | -1.382438 | 2.380358  |
| C | 1.361033  | -1.087584 | -0.679469 | C | 1.077169  | -1.264432 | -0.441045 |
| C | 0.556842  | -2.298548 | -0.375394 | C | 0.024987  | -2.236047 | -0.263843 |
| C | -0.730379 | -2.081603 | 0.147839  | C | -1.234421 | -1.815639 | 0.231038  |
| C | 0.937427  | -3.628351 | -0.653042 | C | 0.155209  | -3.605246 | -0.623134 |
| C | -1.632579 | -3.117848 | 0.397730  | C | -2.312316 | -2.689533 | 0.387523  |
| H | -1.030480 | -1.059470 | 0.327027  | H | -1.374701 | -0.771159 | 0.472788  |
| C | 0.049447  | -4.671585 | -0.403899 | C | -0.911096 | -4.477895 | -0.460868 |

|   |           |           |           |   |           |           |           |
|---|-----------|-----------|-----------|---|-----------|-----------|-----------|
| H | 1.903146  | -3.844020 | -1.096745 | H | 1.075695  | -3.968400 | -1.064051 |
| C | -1.229467 | -4.429275 | 0.114916  | C | -2.143380 | -4.037115 | 0.041276  |
| H | 0.345355  | -5.691774 | -0.633312 | H | -0.795196 | -5.519335 | -0.748655 |
| H | -1.900423 | -5.264887 | 0.282959  | H | -2.958970 | -4.743918 | 0.145247  |
| C | -3.612525 | -1.749607 | -0.063889 | C | -4.038172 | -1.009515 | -0.063283 |
| O | -4.200841 | -2.032766 | -1.086730 | O | -4.649832 | -1.155176 | -1.101647 |
| C | -3.035578 | -2.760437 | 0.925570  | C | -3.652942 | -2.128526 | 0.900453  |
| H | -2.914483 | -2.245719 | 1.885464  | H | -3.472991 | -1.668059 | 1.878301  |
| C | -3.984074 | -3.948906 | 1.103847  | C | -4.783251 | -3.153295 | 1.024716  |
| H | -4.169770 | -4.453330 | 0.151334  | H | -5.032928 | -3.588355 | 0.052859  |
| H | -3.566845 | -4.673214 | 1.809618  | H | -4.501871 | -3.958970 | 1.709130  |
| H | -4.945873 | -3.608505 | 1.500007  | H | -5.683325 | -2.673285 | 1.421352  |

ISC  $T_1/S_0$   
2

|   |           |           |           |
|---|-----------|-----------|-----------|
| O | -3.480668 | -0.147859 | 0.113039  |
| C | -3.443728 | 0.931606  | -0.844920 |
| H | -2.713642 | 0.679496  | -1.620893 |
| H | -4.423920 | 1.044523  | -1.317341 |
| O | -1.930748 | 2.046416  | 0.738700  |
| C | -2.683136 | 3.324021  | -1.128195 |
| C | -1.151091 | 3.223087  | -1.131410 |
| H | -3.118125 | 3.149361  | -2.120852 |
| H | -0.661087 | 4.137115  | -1.471208 |
| H | -0.814712 | 2.389016  | -1.757033 |
| O | -3.140483 | 4.559920  | -0.583696 |
| H | -2.834117 | 5.271778  | -1.168764 |
| N | 0.403487  | 2.237614  | 0.650496  |
| C | 1.557200  | 2.979128  | 0.513208  |
| O | 1.563933  | 4.146846  | 0.133355  |
| N | 2.730981  | 2.309990  | 0.848324  |
| H | 3.570279  | 2.875279  | 0.788058  |
| C | -3.073989 | 2.223977  | -0.123824 |
| H | -3.909982 | 2.558190  | 0.498330  |
| C | 0.468479  | 0.823132  | 0.849343  |
| H | -0.488152 | 0.505491  | 1.253142  |
| O | 0.636209  | 0.181685  | -0.471913 |
| C | 2.629369  | -1.101900 | -0.874749 |
| C | 3.594327  | -2.032150 | -0.421443 |
| C | 3.020469  | -0.169303 | -1.864865 |
| C | 4.874174  | -2.052689 | -0.967474 |
| H | 3.361478  | -2.698404 | 0.401181  |
| C | 4.296923  | -0.208106 | -2.416504 |
| H | 2.299901  | 0.563858  | -2.208321 |
| C | 5.230320  | -1.152338 | -1.976609 |
| H | 5.603089  | -2.765149 | -0.591649 |
| H | 4.567080  | 0.503283  | -3.192093 |
| H | 6.228299  | -1.178221 | -2.404838 |
| C | -0.872359 | 2.912531  | 0.341730  |
| H | -0.895849 | 3.832293  | 0.935194  |

$^1O_{xe_2}$

|   |           |           |           |
|---|-----------|-----------|-----------|
| O | -3.028138 | 1.539926  | -0.013038 |
| C | -3.459161 | 0.471523  | 0.859554  |
| H | -2.664198 | 0.272438  | 1.584702  |
| H | -4.349814 | 0.789208  | 1.409990  |
| O | -2.695132 | -1.161496 | -0.823664 |
| C | -4.048094 | -1.979975 | 0.948103  |
| C | -2.658297 | -2.627064 | 1.022326  |
| H | -4.423489 | -1.680364 | 1.935204  |
| H | -2.693511 | -3.686458 | 1.283837  |
| H | -2.027484 | -2.110783 | 1.753926  |
| O | -4.992521 | -2.807936 | 0.274606  |
| H | -5.124922 | -3.602992 | 0.816158  |
| N | -0.648004 | -2.278263 | -0.509741 |
| C | 0.082713  | -3.429551 | -0.393229 |
| O | -0.403294 | -4.527732 | -0.153363 |
| N | 1.465081  | -3.288168 | -0.592303 |
| H | 1.981287  | -4.159684 | -0.525026 |
| C | -3.786077 | -0.769475 | 0.036136  |
| H | -4.650993 | -0.577483 | -0.605548 |
| C | -0.009078 | -1.013855 | -0.622363 |
| H | -0.723822 | -0.318747 | -1.056826 |
| O | 0.509458  | -0.481451 | 0.632025  |
| C | 2.904832  | 0.053788  | 0.759945  |
| C | 4.181203  | 0.134320  | 0.185536  |
| C | 2.792286  | -0.028780 | 2.154354  |
| C | 5.320016  | 0.141074  | 0.992745  |
| H | 4.295062  | 0.159666  | -0.892651 |
| C | 3.932442  | -0.022629 | 2.959864  |
| H | 1.808462  | -0.100890 | 2.605676  |
| C | 5.200533  | 0.065813  | 2.382240  |
| H | 6.302261  | 0.197995  | 0.531655  |
| H | 3.827202  | -0.087510 | 4.039495  |
| H | 6.088553  | 0.069689  | 3.008282  |
| C | -2.122353 | -2.390422 | -0.394532 |
| H | -2.429295 | -3.196020 | -1.068283 |



|   |           |           |           |   |           |           |           |
|---|-----------|-----------|-----------|---|-----------|-----------|-----------|
| C | 2.825387  | 1.149189  | 1.640932  | C | 2.167957  | -2.208549 | -1.101474 |
| O | 3.901625  | 0.856594  | 2.173990  | O | 3.338374  | -2.327675 | -1.427624 |
| C | 1.594506  | 0.410491  | 1.757487  | C | 1.377980  | -0.916622 | -1.273964 |
| C | 1.363603  | -0.484014 | 2.929068  | C | 1.455162  | -0.474574 | -2.733447 |
| H | 2.318690  | -0.850371 | 3.314496  | H | 2.494637  | -0.332601 | -3.040779 |
| H | 0.865658  | 0.059807  | 3.749376  | H | 1.016098  | -1.244085 | -3.378746 |
| H | 0.721841  | -1.336455 | 2.680418  | H | 0.908602  | 0.457140  | -2.891463 |
| C | 1.267458  | -1.048344 | -0.357250 | C | 1.638748  | 0.121209  | -0.072820 |
| C | 0.400068  | -2.173812 | -0.071865 | C | 1.271014  | 1.562304  | -0.475078 |
| C | -0.969328 | -1.900713 | 0.164166  | C | -0.005890 | 2.026922  | -0.145440 |
| C | 0.792267  | -3.537483 | -0.089780 | C | 2.113718  | 2.397781  | -1.217055 |
| C | -1.921262 | -2.893251 | 0.386421  | C | -0.504570 | 3.250409  | -0.599407 |
| H | -1.296688 | -0.874586 | 0.125410  | H | -0.618970 | 1.381298  | 0.465506  |
| C | -0.145979 | -4.532690 | 0.150192  | C | 1.646320  | 3.641316  | -1.649358 |
| H | 1.810502  | -3.821021 | -0.321818 | H | 3.121120  | 2.088009  | -1.475373 |
| C | -1.494289 | -4.228685 | 0.387057  | C | 0.344338  | 4.060423  | -1.365722 |
| H | 0.168485  | -5.572330 | 0.131951  | H | 2.299503  | 4.283629  | -2.233613 |
| H | -2.197963 | -5.036636 | 0.553777  | H | -0.002966 | 5.014536  | -1.751426 |
| C | -3.727346 | -1.379962 | -0.392140 | C | -2.629072 | 2.667732  | 0.622665  |
| O | -4.115014 | -1.569851 | -1.526203 | O | -2.761049 | 2.830576  | 1.818697  |
| C | -3.387716 | -2.477339 | 0.617200  | C | -1.959570 | 3.663891  | -0.322193 |
| H | -3.454950 | -2.027435 | 1.615087  | H | -2.500686 | 3.611434  | -1.276171 |
| C | -4.400830 | -3.622899 | 0.514483  | C | -2.085730 | 5.085816  | 0.249152  |
| H | -4.349455 | -4.109057 | -0.464046 | H | -1.572559 | 5.161394  | 1.211646  |
| H | -4.221154 | -4.372588 | 1.289778  | H | -1.651592 | 5.818320  | -0.436029 |
| H | -5.416600 | -3.239376 | 0.651171  | H | -3.137832 | 5.347217  | 0.399817  |

<sup>3</sup>TS<sub>2</sub><sup>\*</sup>(b)

|       |           |           |           |
|-------|-----------|-----------|-----------|
| ----- |           |           |           |
| O     | -3.329510 | 0.796917  | -0.062895 |
| C     | -3.473433 | -0.318741 | 0.844757  |
| H     | -2.652637 | -0.278718 | 1.567934  |
| H     | -4.415235 | -0.225815 | 1.393404  |
| O     | -2.360625 | -1.740015 | -0.848445 |
| C     | -3.329068 | -2.826955 | 1.029955  |
| C     | -1.812633 | -3.063727 | 1.018717  |
| H     | -3.709534 | -2.595136 | 2.033450  |
| H     | -1.533952 | -4.075598 | 1.318339  |
| H     | -1.302013 | -2.353489 | 1.677955  |
| O     | -4.048555 | -3.913323 | 0.452366  |
| H     | -3.914735 | -4.689756 | 1.020091  |
| N     | -0.083621 | -2.295866 | -0.706719 |
| C     | 0.937238  | -3.209567 | -0.540533 |
| O     | 0.766951  | -4.374429 | -0.183105 |
| N     | 2.203468  | -2.699616 | -0.792499 |
| H     | 2.955685  | -3.374073 | -0.714409 |
| C     | -3.470753 | -1.634019 | 0.068145  |
| H     | -4.387499 | -1.722603 | -0.522188 |
| C     | 0.192607  | -0.898651 | -0.745466 |
| H     | -0.691407 | -0.404675 | -1.140901 |

<sup>3</sup>Oxe<sub>2</sub><sup>\*</sup>

|       |           |           |           |
|-------|-----------|-----------|-----------|
| ----- |           |           |           |
| O     | -3.067742 | 1.415659  | -0.053116 |
| C     | -3.475209 | 0.336693  | 0.818511  |
| H     | -2.689186 | 0.176043  | 1.562659  |
| H     | -4.388283 | 0.624491  | 1.348189  |
| O     | -2.633315 | -1.294528 | -0.842238 |
| C     | -3.962378 | -2.132453 | 0.933574  |
| C     | -2.543169 | -2.706885 | 1.045375  |
| H     | -4.371043 | -1.835975 | 1.908367  |
| H     | -2.529423 | -3.760997 | 1.327801  |
| H     | -1.953058 | -2.146162 | 1.778145  |
| O     | -4.849939 | -3.018303 | 0.257112  |
| H     | -4.950776 | -3.811443 | 0.808217  |
| N     | -0.525092 | -2.269908 | -0.458069 |
| C     | 0.278474  | -3.353694 | -0.212455 |
| O     | -0.130811 | -4.460369 | 0.119297  |
| N     | 1.653506  | -3.080678 | -0.328319 |
| H     | 2.237061  | -3.898102 | -0.175252 |
| C     | -3.742685 | -0.926698 | 0.005346  |
| H     | -4.607965 | -0.777472 | -0.646756 |
| C     | 0.030624  | -0.960793 | -0.568160 |
| H     | -0.742436 | -0.313148 | -0.975532 |

|   |           |           |           |   |           |           |           |
|---|-----------|-----------|-----------|---|-----------|-----------|-----------|
| O | 0.539537  | -0.352169 | 0.559135  | O | 0.549841  | -0.423142 | 0.679587  |
| C | 2.800224  | 0.543254  | 0.829158  | C | 2.948916  | 0.132809  | 0.741043  |
| C | 4.004076  | 0.946185  | 0.227301  | C | 4.187604  | 0.084834  | 0.087447  |
| C | 2.832629  | 0.061290  | 2.146640  | C | 2.918069  | 0.133073  | 2.141371  |
| C | 5.205018  | 0.896909  | 0.937916  | C | 5.374681  | 0.048970  | 0.822991  |
| H | 4.009410  | 1.282554  | -0.805329 | H | 4.232867  | 0.066370  | -0.997627 |
| C | 4.032876  | 0.014501  | 2.855665  | C | 4.104368  | 0.091413  | 2.875770  |
| H | 1.911447  | -0.275502 | 2.610908  | H | 1.961107  | 0.157702  | 2.653311  |
| C | 5.223391  | 0.435674  | 2.255587  | C | 5.336799  | 0.052054  | 2.218880  |
| H | 6.126871  | 1.211399  | 0.456328  | H | 6.327664  | 0.010550  | 0.302413  |
| H | 4.038847  | -0.352294 | 3.878652  | H | 4.064773  | 0.089311  | 3.961762  |
| H | 6.157976  | 0.396859  | 2.808281  | H | 6.260281  | 0.019414  | 2.790420  |
| C | -1.460885 | -2.767898 | -0.444352 | C | -1.992391 | -2.471835 | -0.367640 |
| H | -1.609152 | -3.657381 | -1.065334 | H | -2.233416 | -3.312488 | -1.026030 |
| C | 2.457037  | -1.489379 | -1.458605 | C | 2.201682  | -2.049785 | -1.162969 |
| O | 3.509853  | -1.495984 | -2.252512 | O | 2.556154  | -2.715765 | -2.267836 |
| C | 1.476622  | -0.429602 | -1.445590 | C | 1.401479  | -0.769494 | -1.263115 |
| C | 1.366127  | 0.357523  | -2.741604 | C | 1.387644  | -0.233175 | -2.691011 |
| H | 2.334231  | 0.783907  | -3.024745 | H | 2.398702  | 0.002483  | -3.039400 |
| H | 1.043273  | -0.299805 | -3.557617 | H | 0.970466  | -0.986936 | -3.365509 |
| H | 0.644041  | 1.170313  | -2.647584 | H | 0.783032  | 0.672709  | -2.763470 |
| C | 1.507973  | 0.597702  | 0.080607  | C | 1.650905  | 0.228623  | -0.030858 |
| C | 0.874540  | 1.939882  | -0.146871 | C | 1.248124  | 1.674607  | -0.360132 |
| C | -0.528530 | 2.010972  | -0.106944 | C | -0.068751 | 2.064191  | -0.097477 |
| C | 1.576363  | 3.119400  | -0.457893 | C | 2.096769  | 2.585240  | -0.999617 |
| C | -1.251129 | 3.164940  | -0.406754 | C | -0.599157 | 3.282029  | -0.528791 |
| H | -1.058792 | 1.118622  | 0.179212  | H | -0.687517 | 1.364969  | 0.443618  |
| C | 0.871657  | 4.290324  | -0.734359 | C | 1.597908  | 3.827225  | -1.400622 |
| H | 2.660711  | 3.130900  | -0.479474 | H | 3.133546  | 2.331976  | -1.199509 |
| C | -0.528723 | 4.324090  | -0.725241 | C | 0.259199  | 4.170082  | -1.191859 |
| H | 1.421738  | 5.198040  | -0.967900 | H | 2.256541  | 4.530857  | -1.902524 |
| H | -1.037489 | 5.251833  | -0.964890 | H | -0.106036 | 5.125979  | -1.555183 |
| C | -3.268405 | 2.016976  | 0.529180  | C | -2.742534 | 2.567822  | 0.583960  |
| O | -3.517895 | 2.193762  | 1.703727  | O | -2.917590 | 2.732471  | 1.774045  |
| C | -2.791835 | 3.104035  | -0.434365 | C | -2.095919 | 3.591315  | -0.348570 |
| H | -3.089116 | 2.790745  | -1.443518 | H | -2.572347 | 3.473327  | -1.330776 |
| C | -3.482010 | 4.434511  | -0.101673 | C | -2.370344 | 5.010859  | 0.174029  |
| H | -3.191983 | 4.787486  | 0.891934  | H | -1.919514 | 5.153376  | 1.159855  |
| H | -3.223931 | 5.201806  | -0.836112 | H | -1.963559 | 5.761510  | -0.508188 |
| H | -4.569580 | 4.312916  | -0.118408 | H | -3.447416 | 5.185425  | 0.260760  |

<sup>1</sup>Oxe<sub>2</sub>\*

|       |           |           |           |
|-------|-----------|-----------|-----------|
| ----- |           |           |           |
| O     | -3.134875 | 1.301913  | -0.035992 |
| C     | -3.489898 | 0.195678  | 0.823093  |
| H     | -2.685337 | 0.051348  | 1.550830  |
| H     | -4.403556 | 0.440060  | 1.372939  |
| O     | -2.616406 | -1.370226 | -0.883327 |
| C     | -3.876841 | -2.290511 | 0.901934  |
| C     | -2.433102 | -2.804555 | 0.979569  |

<sup>1</sup>IM<sub>2</sub>\*

|       |          |           |           |
|-------|----------|-----------|-----------|
| ----- |          |           |           |
| O     | 3.123459 | 0.853545  | 0.055954  |
| C     | 3.230889 | -0.052936 | -1.056738 |
| H     | 2.271066 | -0.027962 | -1.584735 |
| H     | 4.013957 | 0.280800  | -1.741607 |
| O     | 2.789802 | -1.853759 | 0.598440  |
| C     | 3.197118 | -2.505123 | -1.642794 |
| C     | 1.746743 | -2.835580 | -1.279514 |

|   |           |           |           |   |           |           |           |
|---|-----------|-----------|-----------|---|-----------|-----------|-----------|
| H | -4.283852 | -2.028033 | 1.887228  | H | 3.287386  | -2.099437 | -2.658295 |
| H | -2.366882 | -3.859492 | 1.250767  | H | 1.443737  | -3.809848 | -1.658780 |
| H | -1.849321 | -2.225647 | 1.703213  | H | 1.055391  | -2.071782 | -1.646627 |
| O | -4.735541 | -3.203255 | 0.223238  | O | 3.944614  | -3.704415 | -1.494997 |
| H | -4.776334 | -4.016972 | 0.751672  | H | 4.871552  | -3.514476 | -1.714293 |
| N | -0.474920 | -2.291639 | -0.587630 | N | 0.515046  | -2.362170 | 0.900372  |
| C | 0.373448  | -3.357485 | -0.354668 | C | -0.624079 | -3.200954 | 0.669018  |
| O | -0.005163 | -4.469666 | 0.019607  | O | -0.533884 | -4.191826 | -0.020593 |
| N | 1.707381  | -3.072571 | -0.585347 | N | -1.768589 | -2.800159 | 1.308042  |
| H | 2.329380  | -3.866406 | -0.482007 | H | -2.588804 | -3.374973 | 1.138063  |
| C | -3.723612 | -1.061679 | -0.008870 | C | 3.560277  | -1.459326 | -0.569647 |
| H | -4.605814 | -0.933190 | -0.642552 | H | 4.608687  | -1.522021 | -0.266938 |
| C | 0.037810  | -0.969082 | -0.658664 | C | 0.455598  | -1.281283 | 1.660793  |
| H | -0.748152 | -0.327044 | -1.052359 | H | 1.382893  | -0.733903 | 1.769110  |
| O | 0.532202  | -0.447620 | 0.608100  | O | -0.890053 | -0.366597 | -0.714132 |
| C | 2.907995  | 0.173127  | 0.732928  | C | -3.087768 | 0.501738  | -0.979653 |
| C | 4.153431  | 0.329412  | 0.107444  | C | -4.123888 | 1.340701  | -0.499068 |
| C | 2.866387  | -0.046084 | 2.115551  | C | -3.485959 | -0.643268 | -1.715668 |
| C | 5.333589  | 0.271243  | 0.852949  | C | -5.463537 | 1.070624  | -0.772894 |
| H | 4.212725  | 0.480175  | -0.966037 | H | -3.880897 | 2.189765  | 0.130746  |
| C | 4.046402  | -0.104229 | 2.859701  | C | -4.823049 | -0.905072 | -1.993719 |
| H | 1.907206  | -0.180663 | 2.604624  | H | -2.708995 | -1.315433 | -2.065012 |
| C | 5.284105  | 0.057842  | 2.231422  | C | -5.829716 | -0.047470 | -1.530654 |
| H | 6.290270  | 0.390189  | 0.351939  | H | -6.230828 | 1.732782  | -0.377414 |
| H | 3.997522  | -0.279709 | 3.930998  | H | -5.087192 | -1.785842 | -2.575591 |
| H | 6.201888  | 0.013192  | 2.811098  | H | -6.874904 | -0.252880 | -1.745044 |
| C | -1.927039 | -2.535750 | -0.444146 | C | 1.807474  | -2.791276 | 0.254079  |
| H | -2.169044 | -3.375311 | -1.104388 | H | 2.031092  | -3.766516 | 0.695813  |
| C | 2.159686  | -1.986750 | -1.343368 | C | -1.947164 | -1.662608 | 2.088547  |
| O | 3.437155  | -2.018927 | -1.684977 | O | -3.033681 | -1.375179 | 2.563285  |
| C | 1.398278  | -0.705068 | -1.352028 | C | -0.724768 | -0.870714 | 2.303008  |
| C | 1.384541  | -0.057761 | -2.737681 | C | -0.768228 | 0.344320  | 3.142199  |
| H | 2.389076  | 0.259658  | -3.035055 | H | 0.106213  | 0.402880  | 3.798459  |
| H | 1.025378  | -0.777968 | -3.479624 | H | -0.730236 | 1.229186  | 2.486821  |
| H | 0.730700  | 0.816800  | -2.756191 | H | -1.688724 | 0.380940  | 3.724290  |
| C | 1.613780  | 0.274889  | -0.043163 | C | -1.652296 | 0.681023  | -0.691820 |
| C | 1.168646  | 1.716304  | -0.312782 | C | -1.047831 | 1.988162  | -0.407791 |
| C | -0.172910 | 2.045047  | -0.078611 | C | 0.286048  | 1.997018  | 0.075689  |
| C | 2.000001  | 2.694533  | -0.875676 | C | -1.623569 | 3.264450  | -0.659807 |
| C | -0.734814 | 3.264591  | -0.462466 | C | 1.014019  | 3.162554  | 0.319660  |
| H | -0.783297 | 1.299323  | 0.405589  | H | 0.754915  | 1.034675  | 0.219554  |
| C | 1.465135  | 3.934204  | -1.231321 | C | -0.908445 | 4.429924  | -0.413743 |
| H | 3.052471  | 2.497898  | -1.051077 | H | -2.615161 | 3.341816  | -1.090997 |
| C | 0.108312  | 4.217758  | -1.050838 | C | 0.407928  | 4.403278  | 0.077406  |
| H | 2.112706  | 4.686781  | -1.673186 | H | -1.373730 | 5.390166  | -0.626164 |
| H | -0.280127 | 5.178526  | -1.374066 | H | 0.937608  | 5.333367  | 0.250449  |
| C | -2.864001 | 2.461345  | 0.613380  | C | 3.169621  | 2.178907  | -0.257875 |
| O | -3.060099 | 2.610369  | 1.802156  | O | 3.640680  | 2.598919  | -1.294296 |
| C | -2.246307 | 3.513777  | -0.305171 | C | 2.475753  | 3.027800  | 0.799777  |
| H | -2.703131 | 3.381061  | -1.294857 | H | 2.479341  | 2.457164  | 1.735174  |

|   |           |          |           |   |          |          |          |
|---|-----------|----------|-----------|---|----------|----------|----------|
| C | -2.587343 | 4.918133 | 0.218712  | C | 3.218114 | 4.349970 | 1.012100 |
| H | -2.144167 | 5.081620 | 1.204775  | H | 3.291787 | 4.915662 | 0.079079 |
| H | -2.218255 | 5.688525 | -0.462788 | H | 2.702078 | 4.965966 | 1.754409 |
| H | -3.671529 | 5.040486 | 0.305543  | H | 4.233368 | 4.161541 | 1.375983 |

ISC<sup>S<sub>1</sub>/T<sub>1</sub></sup><sub>2</sub>(a)

ISC<sup>S<sub>1</sub>/T<sub>1</sub></sup><sub>2</sub>(b)

|   |           |           |           |   |           |           |           |
|---|-----------|-----------|-----------|---|-----------|-----------|-----------|
| O | 3.161280  | 0.780018  | 0.155652  | O | -3.096444 | 1.300522  | -0.086878 |
| C | 3.246370  | -0.165939 | -0.926652 | C | -3.501506 | 0.200495  | 0.756580  |
| H | 2.294169  | -0.124458 | -1.468464 | H | -2.743866 | 0.061669  | 1.532777  |
| H | 4.052022  | 0.116603  | -1.608273 | H | -4.443007 | 0.449831  | 1.255541  |
| O | 2.646305  | -1.926279 | 0.717729  | O | -2.589721 | -1.415461 | -0.909833 |
| C | 3.249397  | -2.624710 | -1.477001 | C | -3.856015 | -2.287622 | 0.876597  |
| C | 1.778770  | -2.995754 | -1.203839 | C | -2.395039 | -2.724795 | 1.072778  |
| H | 3.372859  | -2.211536 | -2.480999 | H | -4.318703 | -2.027676 | 1.837744  |
| H | 1.534688  | -3.994360 | -1.562559 | H | -2.274354 | -3.766432 | 1.362501  |
| H | 1.100591  | -2.274549 | -1.670002 | H | -1.864753 | -2.088423 | 1.785003  |
| O | 4.137880  | -3.728998 | -1.419165 | O | -4.604932 | -3.266752 | 0.180945  |
| H | 4.126537  | -4.105941 | -0.524046 | H | -4.689140 | -4.047686 | 0.752891  |
| N | 0.344097  | -2.426949 | 0.827178  | N | -0.449443 | -2.225752 | -0.461972 |
| C | -0.748203 | -3.300462 | 0.558836  | C | 0.500209  | -3.330354 | -0.107059 |
| O | -0.591299 | -4.331352 | -0.062765 | O | 0.008174  | -4.358138 | 0.330241  |
| N | -1.951025 | -2.882300 | 1.070853  | N | 1.746656  | -2.923890 | -0.272642 |
| H | -2.744957 | -3.483278 | 0.870501  | H | 2.441422  | -3.607579 | 0.009089  |
| C | 3.518355  | -1.563595 | -0.390328 | C | -3.715056 | -1.076335 | -0.056687 |
| H | 4.538813  | -1.630756 | -0.005493 | H | -4.578176 | -0.974894 | -0.717147 |
| C | 0.204133  | -1.310412 | 1.542457  | C | 0.025072  | -0.857103 | -0.620777 |
| H | 1.111668  | -0.743826 | 1.702049  | H | -0.807812 | -0.263419 | -0.986247 |
| O | -0.813677 | -0.219704 | -0.874908 | O | 0.523041  | -0.386516 | 0.639555  |
| C | -3.006799 | 0.677610  | -0.989640 | C | 2.936197  | 0.146036  | 0.715800  |
| C | -4.006821 | 1.520471  | -0.441260 | C | 4.168970  | 0.101255  | 0.051334  |
| C | -3.451495 | -0.449717 | -1.728505 | C | 2.911439  | 0.106338  | 2.116146  |
| C | -5.360247 | 1.266677  | -0.651553 | C | 5.359240  | 0.032278  | 0.779861  |
| H | -3.725164 | 2.356702  | 0.188847  | H | 4.200262  | 0.108418  | -1.033367 |
| C | -4.804255 | -0.696925 | -1.934497 | C | 4.100680  | 0.029477  | 2.842040  |
| H | -2.703158 | -1.120360 | -2.137501 | H | 1.958416  | 0.132446  | 2.636233  |
| C | -5.775694 | 0.161534  | -1.403313 | C | 5.328492  | -0.005947 | 2.175381  |
| H | -6.099403 | 1.931568  | -0.210019 | H | 6.309406  | -0.000534 | 0.253345  |
| H | -5.106954 | -1.567361 | -2.512530 | H | 4.068062  | 0.000973  | 3.928029  |
| H | -6.832441 | -0.032707 | -1.563150 | H | 6.254764  | -0.065332 | 2.740006  |
| C | 1.689862  | -2.875450 | 0.324197  | C | -1.855984 | -2.485026 | -0.383081 |
| H | 1.865279  | -3.828763 | 0.833716  | H | -2.038077 | -3.411672 | -0.953223 |
| C | -2.204333 | -1.733714 | 1.818477  | C | 2.208827  | -1.932517 | -1.424100 |
| O | -3.329168 | -1.471143 | 2.217115  | O | 2.470142  | -2.493764 | -2.519292 |
| C | -1.018830 | -0.908567 | 2.084897  | C | 1.363863  | -0.652260 | -1.330791 |
| C | -1.149247 | 0.300153  | 2.933564  | C | 1.277274  | -0.001473 | -2.707309 |
| H | -0.874266 | 0.058285  | 3.971093  | H | 2.269714  | 0.313913  | -3.044858 |
| H | -0.482841 | 1.096340  | 2.591623  | H | 0.912296  | -0.735893 | -3.429840 |
| H | -2.183538 | 0.647110  | 2.938863  | H | 0.617973  | 0.868856  | -2.713020 |
| C | -1.564396 | 0.837790  | -0.756807 | C | 1.646000  | 0.286339  | -0.052170 |

|   |           |          |           |   |           |          |           |
|---|-----------|----------|-----------|---|-----------|----------|-----------|
| C | -0.921212 | 2.108488 | -0.405690 | C | 1.216474  | 1.742768 | -0.292720 |
| C | 0.409151  | 2.056945 | 0.079246  | C | -0.112674 | 2.089053 | -0.025687 |
| C | -1.467795 | 3.404054 | -0.606393 | C | 2.042766  | 2.699197 | -0.891773 |
| C | 1.172520  | 3.192584 | 0.357312  | C | -0.681050 | 3.295555 | -0.434465 |
| H | 0.846284  | 1.077103 | 0.202478  | H | -0.719060 | 1.363249 | 0.492724  |
| C | -0.718707 | 4.539874 | -0.321769 | C | 1.507009  | 3.936920 | -1.260540 |
| H | -2.459098 | 3.521986 | -1.028165 | H | 3.087755  | 2.482310 | -1.092889 |
| C | 0.599082  | 4.455962 | 0.155749  | C | 0.154382  | 4.229615 | -1.063379 |
| H | -1.158189 | 5.519837 | -0.493752 | H | 2.147650  | 4.675687 | -1.734870 |
| H | 1.157574  | 5.364465 | 0.352044  | H | -0.239110 | 5.180365 | -1.410110 |
| C | 3.283421  | 2.090746 | -0.195284 | C | -2.824554 | 2.447614 | 0.596031  |
| O | 3.785226  | 2.455191 | -1.238252 | O | -3.037628 | 2.558861 | 1.785040  |
| C | 2.631090  | 3.006934 | 0.832705  | C | -2.193297 | 3.535470 | -0.274516 |
| H | 2.618143  | 2.472443 | 1.789497  | H | -2.643427 | 3.449198 | -1.272141 |
| C | 3.433621  | 4.302086 | 0.990411  | C | -2.530927 | 4.916967 | 0.311573  |
| H | 3.508109  | 4.838181 | 0.040206  | H | -2.111160 | 5.022021 | 1.315623  |
| H | 2.964357  | 4.960310 | 1.727250  | H | -2.128408 | 5.712572 | -0.320479 |
| H | 4.448594  | 4.079872 | 1.335402  | H | -3.614947 | 5.053854 | 0.376355  |
